1 **Comparative Analysis of In Vitro Responses and Regeneration Between Diverse Bioenergy**  
2 **Sorghum Genotypes**

3

4 Barry S. Flinn<sup>1,3\*</sup>, Savannah Dale<sup>2,4</sup>, Andrew Disharoon<sup>2</sup> and Stephen Kresovich<sup>1,2</sup>

5

6 <sup>1</sup>Advanced Plant Technology Program, Clemson University, Clemson, SC 29634, USA

7 <sup>2</sup> Department of Plant and Environmental Sciences, Clemson University, Clemson, SC 29634,  
8 USA

9 <sup>3</sup>Current Address: GenPhyto Consulting, Ottawa, ON K1H 6M8, Canada

10 <sup>4</sup>Current Address: Plant Breeding and Genetics Section, School of Integrative Plant Science,  
11 Cornell University, Ithaca, NY 14853, USA

12

13 \*Corresponding author: [genphytoconsulting@gmail.com](mailto:genphytoconsulting@gmail.com)

14 Flinn ORCID: 0000-0002-3843-3990

15 Kresovich ORCID: 0000-0001-9995-2375

16

17 **Keywords**

18 In vitro regeneration, Medium browning, Albino plantlet, Genotype, Bioenergy sorghum

19 **Abbreviations**

20 ABA, Abscisic acid; BA, N<sup>6</sup>-Benzylaminopurine; BAP, Bioenergy association panel; CIM, Callus  
21 Induction Medium; DAP, Days after pollination; ERM, Elongation and Rooting Medium; IAA,  
22 Indole-3-acetic acid; KIN, Kinetin; LG, Liu and Godwin; MS, Murashige and Skoog; NAM,  
23 Nested association mapping; RM, Regeneration Medium; WU, Wu et al.; TDZ, Thidiazuron; 2,4-  
24 D, 2,4-Dichlorophenoxyacetic acid.

## 25 **Abstract**

26 Sorghum has been considered a recalcitrant plant in vitro, and suffers from a lack of  
27 regeneration protocols that function broadly and efficiently across a range of genotypes. This study  
28 was initiated to identify differential genotype-in vitro protocol responses across a range of  
29 bioenergy sorghum bioenergy parental lines, in order to characterize response profiles for use in  
30 future genetic studies. Seven bioenergy sorghum genotypes were compared, along with the  
31 common grain sorghum genotype Tx430, for their in vitro regeneration responses using two  
32 different in vitro protocols, LG and WU. All genotypes displayed some level of response during  
33 in vitro culture with both protocols. Distinct genotype-protocol responses were observed, with the  
34 WU protocol significantly better for plantlet regeneration. All bioenergy genotypes, with the  
35 exception of Chinese Amber, performed as well, if not better than Tx430, with Rio and PI329311  
36 the top regenerating lines. Genotypes displayed protocol-dependent, differential phenolic  
37 exudation responses, as indicated by medium browning. During the callus induction phase,  
38 genotypes prone to medium browning exhibited a response on WU medium which was either equal  
39 or greater than on LG medium, with Pink Kafir and PI329311 the most prone to medium browning.  
40 Genotype- and protocol-dependent albino plantlet regeneration was also noted, with three of the  
41 bioenergy genotypes showing albino plantlet regeneration. Grassl, Rio and Pink Kafir were  
42 susceptible to albino plantlet regeneration, with the response strongly associated with the WU  
43 protocol. Pink Kafir displayed the highest albino formation, with close to 25% of regenerating  
44 explants forming albino plantlets.

45

46

47

48

49

50

51

52

## 53 **Introduction**

54 Sorghum [*Sorghum bicolor* (L.) Moench] ranks fifth of the major grain crops in production,  
55 area harvested, and yield worldwide (FAOSTAT Database 2017), and more than 300 million  
56 people use it as a staple food, particularly in developing semiarid tropical regions (Kebede et al.  
57 2001). In addition to its use as a human food source, sorghum is also used for animal feed  
58 (Mabelebele et al. 2018), brewery or bio-functional malted beverages (Garzón and Drago 2018),  
59 building materials (Khazaeian et al. 2015), as a source of sweet syrup/juice (Asikin et al. 2018), a  
60 source of bioactive metabolites (Vanamala et al. 2018), and for bioenergy (Rooney et al. 2007). It  
61 is a hardy crop, able to withstand both drought and flooding conditions, as well as produce high  
62 yields, making it a model crop for agricultural adaptation to climate change and human population  
63 growth (Paterson et al. 2009).

64 As with most crops of value, there are concerns associated with sorghum production,  
65 including losses due to abiotic and biotic stress pressure, as well as the desire to enhance  
66 composition and increase yield, indicating that a variety of targets exist for trait improvement.  
67 Improvement efforts have utilized breeding, coupled with approaches such as QTL identification  
68 and mapping, molecular marker identification and genome wide association studies, with the goal  
69 of improving germplasm while also gaining an understanding of the genetic loci/genes/allelic  
70 variation contributing to the various traits (Chopra et al. 2015, Ali et al. 2016, Boyles et al. 2016,  
71 Brenton et al. 2016, Boyles et al. 2017, Mofokeng et al. 2017, Disasa et al. 2018, Boyles et al.  
72 2019, Mace et al. 2019).

73 Plant tissue culture, coupled with in vitro regeneration, can be integrated into sorghum trait  
74 improvement programs, providing opportunities for trait modification without the temporal  
75 restrictions of traditional breeding, through somaclonal mutagenesis (Bhaskaran et al. 1987), the  
76 rapid development of homozygous lines by anther culture to create haploid plants, followed by  
77 chromosome doubling (Kumaravadivel and Rangasamy 1994), and the development of improved  
78 germplasm through the creation of transgenic (Reddy et al. 2015) or genome-edited (Char et al.  
79 2019) plants. Sorghum has been the subject of several tissue culture studies, in which a variety of  
80 protocols have been used with a relatively small number of genotypes. These studies have shown  
81 that sorghum in vitro responsiveness displays genotype-dependency (Kaeppeler and Pedersen 1997,  
82 Liu et al. 2015, Omer et al. 2018), with sorghum considered to be relatively recalcitrant to in vitro

83 manipulation, due to factors like genotype-dependent phenolic production and tissue browning.  
84 Efforts to improve this recalcitrance have used different tissue culture media modifications to  
85 improve cell survival (Elkonin et al. 1995, Liu et al. 2015, Dreger et al. 2019) and subsequent  
86 regeneration, as well as the overexpression of *Baby Boom* and *Wuschel* genes to stimulate the  
87 embryogenic potential of explant cells, and improve regeneration (Lowe et al. 2016). An  
88 understanding of the genetics associated with tissue culture/in vitro responsiveness would facilitate  
89 breeding for improved regenerability/transformability, but also provide for a greater understanding  
90 of sorghum developmental processes. Furthermore, as regenerability is associated with organ  
91 formation, a better understanding of the genetics of in vitro responsiveness and regeneration could  
92 improve our understanding of the genetic loci/genes associated with the improved resource  
93 allocation required for new or replacement organ development, which would be of relevance to  
94 yield and performance enhancement (Arikita et al. 2013). Several studies have used QTL analysis  
95 and GWAS to identify genetic loci and candidate genes involved in tissue culture responsiveness  
96 and regeneration in a limited number of plant types (Tyagi et al. 2010, Begheyn et al. 2018, Ma et  
97 al. 2018), but an understanding of the overall genes and pathways associated with this process  
98 remains to be resolved, especially for recalcitrant sorghum.

99         Our lab has been focused on the use of genetic diversity to improve a wide variety of  
100 sorghum traits, with major interests in bioenergy, sweet, grain and forage types. A key resource of  
101 interest to the sorghum and overall plant research community was developed, the Bioenergy  
102 Association Panel (BAP), comprising genetically diverse cellulosic and sweet sorghum germplasm  
103 (Brenton et al. 2016). A subset of the BAP was used as parents to create Nested Association  
104 Mapping (NAM) populations, where nine NAM populations were developed. All NAM parental  
105 lines and the population individuals have been characterized through genotyping-by-sequencing  
106 (GBS), with whole genome sequencing of the NAM parental lines planned for the future. These  
107 NAM parents and the resultant populations provide a new resource to explore the genetics  
108 associated with a variety of sorghum traits. To initiate a characterization of the NAM parental lines  
109 for in vitro responsiveness and regeneration, their performance was assessed during culture under  
110 two different in vitro protocols, and compared against genotype Tx430, a grain type sorghum  
111 commonly used for in vitro studies. The goal was to identify differential genotype-protocol  
112 responses that could be used for future genetic studies.

## 113 **Materials and methods**

### 114 **Plant materials**

115 A variety of sorghum genotypes, representing various types, races and location of origin  
116 were used in this study (Table 1). Mature seeds were planted in 3 gallon pots containing Sungro  
117 Fafard® germination mix (Agawam, MA, USA) fertilized with the appropriate dose of Scotts  
118 Osmocote Classic 14-14-14 pellets (Marysville, OH, USA), and placed in the Clemson University  
119 Biosystems Research Complex greenhouse for germination and growth. Plants were checked daily  
120 and watered as necessary. At the onset of pollen production, each floral spike was bagged, and  
121 allowed to develop for 14 days. After 14 days, developing panicles were excised and removed to  
122 the laboratory. Immature seeds were removed from the middle third of each panicle, placed into  
123 sterile 50 ml conical tubes and sterilized with 45 ml of 20% concentrated commercial bleach  
124 (8.25% sodium hypochlorite active ingredient) containing two drops of Tween 20, with  
125 sterilization for 25 min at room temperature on an orbital shaker (220 rpm). In a sterile tissue  
126 culture hood, the bleach solution was removed, seeds were rinsed five times each with 45 ml of  
127 sterile RO water, and then transferred to a sterile petri dish for storage while embryo excisions  
128 took place.

### 129 **Tissue culture media**

130 Two different tissue culture protocols, using Murashige and Skoog basal salts (Murashige  
131 and Skoog 1962), were tested with all genotypes and were adapted from Liu and Godwin (2012)  
132 and Wu et al. (2014). All media components were obtained from Phytotechnology Laboratories  
133 (Lenexa KS, USA), except for the gelling agents (agar and Phytigel™), which were obtained from  
134 Sigma-Aldrich (St. Louis, MO, USA). As both original published papers were focused on  
135 transformation, in this current work, no selection agents were included in the media preparations.  
136 The LG protocol used Callus Induction Medium (CIM) and Regeneration Medium (RM) as  
137 described (Liu and Godwin 2012). The WU protocol used DBC3 and PHI-XM media (Wu et al.  
138 2014) as CIM and RM, respectively. All compounds for both CIM and WU RM were added prior  
139 to pH adjustment and autoclaving for 15 min at 121°C, with the exception of copper sulfate, which  
140 was added as a sterile solution to pre-cooled (55°C) media. During LG RM preparation, growth  
141 regulators were added post-autoclaving to pre-cooled (55°C) medium. Briefly, to prepare a final 1  
142 L of medium, 960 ml was prepared, and prior to the addition of agar, growth regulators and copper

143 sulfate, a 160 ml aliquot was removed. The remaining 800 ml aliquot was pH adjusted, the agar  
144 added, the solution autoclaved as above, and then cooled to 55°C in a water bath. To the 160 ml  
145 aliquot, all growth regulators were added, the solution brought to 200 ml with RO water, pH  
146 adjusted to 5.7, and then filter sterilized using a 250 ml 0.2 µm filter unit. This 200 ml was added  
147 to the 800 ml pre-cooled autoclaved fraction, followed by the addition of the sterile copper sulfate  
148 solution. CIM and RM were dispensed as 20 ml aliquots into sterile 100 x 15 mm petri plates, air  
149 dried for 25 min in the hood, and then stored in the dark at 6°C until use. Prior to use, plates were  
150 allowed to equilibrate to room temperature in the dark for several hours.

151 Following culture on each RM tissue culture regime, explants were transferred to  
152 Elongation and Rooting Medium (ERM) - ½ MS salts, ½ MS vitamins, sucrose (30 g/L),  
153 Phytigel™ (3 g/L), pH 5.8. In this case, the autoclaved medium was dispensed as 50 ml aliquots  
154 into sterile, Magenta GA-7 vessels (Sigma-Aldrich, St. Louis, MO, USA), allowed to air dry for  
155 25 min in the hood prior to vessel closure, and then stored at 6°C until use. Prior to use, vessels  
156 were allowed to equilibrate to room temperature in the dark for several hours.

## 157 **Explant culture**

158 Immature embryos were excised aseptically under a dissecting microscope, and placed  
159 scutellum side up on the appropriate CIM, with 12 embryos per plate and approximately 60  
160 embryos per medium per genotype per replicate, with 3 replicates per medium per genotype. Plates  
161 were wrapped in foil and incubated in the dark for two weeks for callus induction. Following the  
162 two weeks, all explants were transferred to their respective regeneration medium (RM), retaining  
163 the 12 explants per plate arrangement. All explants were cultured for a total of four weeks on RM,  
164 with subculture to fresh RM after the initial two weeks. The LG protocol explants were exposed  
165 to a 16 h light/8 h dark regime for the entire four-week period. The WU protocol explants were  
166 wrapped in foil and cultured in the dark for the first two weeks, and then cultured in the light/dark  
167 regime described above for the remaining two weeks. Explants were cultured in a VWR incubator  
168 with a 27°C light (16 h) /20°C dark (8 h) cycle, and a light intensity of 70 µmol m<sup>-2</sup> s<sup>-1</sup>.

## 169 **Tissue culture data collection**

170 All explants, unless they exhibited fungal/bacterial contamination, were transferred to the  
171 appropriate media for the complete eight-week in vitro culture scheme. Digital photos were taken

172 of all explants for each genotype/media replication at the end of culture on CIM, RM and ERM.  
173 The photos taken after culture on CIM were used for quantification of medium browning, as  
174 described below. Following culture on RM, explants were qualitatively assessed overall for their  
175 degree of callus proliferation, as well as for medium browning. A callus proliferation index (+, ++,  
176 +++, +++) based on qualitative, visual assessment of callus for all explants relative to initial  
177 embryo explants per treatment was made for genotype/media combinations. Similarly, a medium  
178 browning index (+, ++, +++, +++) based on qualitative, visual assessment of medium browning  
179 for all explants relative to initial embryo explants per treatment was made for genotype/media  
180 combinations. Upon completion of the eight-week culture scheme, explants were assessed for the  
181 number of surviving, non-necrotic explants, and the number of surviving explants that exhibited  
182 plantlet regeneration, with the information used to generate percentage response. For each explant,  
183 independent and rooted plantlets could easily be removed from explant callus and were counted,  
184 to provide a determination of the number of regenerants per responding explant. Mean values,  
185 standard deviations and standard errors were calculated.

## 186 **Image analysis**

187 Digital color images of petri plates taken for all genotypes following two weeks of culture  
188 on CIM were quantified using the Fiji image-analysis software platform (Schindelin et al. 2012).  
189 Color images were converted to 8-bit black and white images, and the oval/elliptical tool used to  
190 outline each plate, followed by a determination of the total plate area using the area measurement  
191 function. The free hand line tool was used to outline any visibly darkened region of media around  
192 each individual explant per plate, and the total area of browning determined using the area  
193 measurement function. The total media browning area per plate was determined by adding the  
194 browning area measurements, and then expressing this combined area as a percentage of the total  
195 petri plate area.

## 196 **Statistical analysis**

197 For experiments, data comparisons were made between all genotypes within a tissue  
198 culture protocol (all genotypes on LG, all genotypes on WU) and within each individual genotype  
199 on LG and WU. Data was subjected to one-way ANOVA, followed by Tukey's HSD Post-hoc  
200 Test. Data which showed a probability of  $P=0.05$  or less were considered significantly different.

## 201 **Results**

202 Bioenergy sorghum trait improvement is a current focus of several labs, with tissue culture  
203 representing one tool for use in this effort. The grain sorghum genotype Tx430 has been commonly  
204 and successfully used in transformation and regeneration studies. Therefore, this genotype was  
205 used as a baseline for comparative purposes to characterize the in vitro responses of several diverse  
206 bioenergy sorghum genotypes used as parents to create NAM populations.

207 The general tissue culture steps for both in vitro protocols (LG and WU) are shown using  
208 Tx430 as the representative genotype (Fig. 1). Freshly excised 14 DAP embryos were placed on  
209 LG or WU Callus Induction Medium (CIM) and cultured in the dark for two weeks. During this  
210 period, callus induction and growth took place from the explant scutellum, with the formation of  
211 white and cream-colored calli, or in some cases, browning of the explant and/or medium. After the  
212 CIM phase, all explants were transferred to the respective LG or WU Regeneration Medium (RM),  
213 to allow additional callus proliferation and embryo/plantlet formation. Explants were cultured on  
214 RM for a total of four weeks, with subculture to fresh medium after two weeks. Following culture  
215 on RM, explants on both media exhibited distinct yellow, green, white and/or browning regions.  
216 Distinct morphological structures were observed arising from proliferating calli, with explant calli  
217 on both LG and WU RM forming shoots. The small shoots were more elongated on LG medium  
218 compared to those on WU medium, and generally more adventitious root growth from the calli  
219 cultured on LG RM. All explants were then transferred to Elongation and Rooting Medium (ERM)  
220 for a further two weeks under a 16 h photoperiod, which facilitated substantial shoot elongation  
221 and rooting, producing well-defined rooted plantlets that could easily be plucked from the  
222 associated explant callus. Regenerated plantlets were viable and could be transferred ex vitro into  
223 soil, acclimatized and grown in the greenhouse (data not shown). As our goal was to assess the  
224 overall in vitro responses of explants representing the various bioenergy genotypes for the two  
225 (LG, WU) protocols, rather than optimize the regeneration responses/yield of regenerants, we did  
226 not separate out regenerating and non-regenerating sectors, but kept each explant as intact as  
227 possible throughout all subcultures.

### 228 *CIM Browning Responses*

229 As we followed the in vitro pathway outlined above for Tx430 and the seven genetically  
230 diverse NAM parental genotypes, distinct differences were noted for genotype and media



231 combinations during the two weeks of culture on CIM. A common response phenotype was  
232 phenolic secretion by explants into the medium, with subsequent medium browning (Fig. 2). A  
233 comparison of explants cultured on LG CIM, exhibited very little medium browning with Tx430  
234 and Leoti. In contrast, Pink Kafir exhibited maximal medium browning, while the other genotypes  
235 were intermediate in medium browning. On WU CIM, Tx430 and Leoti also showed minimal  
236 browning response, while Pink Kafir and PI329311 exhibited the highest browning levels.  
237 Comparisons within each genotype across LG and WU CIM revealed a significant increase in  
238 browning on WU CIM for Tx430 and PI329311. We never observed a higher level of browning  
239 for any genotype on LG CIM when compared against WU CIM, indicating that the WU protocol  
240 was more supportive of browning in genotypes prone to phenolic exudation.

#### 241 *RM Responses*

242 Explants were transferred from CIM to RM and cultured for four weeks. During culture on  
243 RM, explants often exhibited continued callus proliferation and an overall increase in size and  
244 mass on both media, although there was an impact of genotype and media combination on observed  
245 responses (Fig. 3). A visual qualitative proliferation index (Table 2) was used to provide a measure  
246 of callus proliferation relative to the initial excised embryo placed into culture. On LG RM, Tx430  
247 and PI329311 displayed the greatest degree of callus proliferation, while Rio, Leoti and Chinese  
248 Amber were the poorest, with Chinese Amber the worst. On WU RM, Tx430, Pink Kafir and  
249 PI329311 were the most proliferative, while Leoti and Chinese Amber were again the poorest in  
250 callus proliferation. Comparisons within each genotype across LG and WU RM revealed that  
251 callus proliferation for Tx430, PI329311, Leoti and Chinese Amber were similar regardless of  
252 culture of LG or WU RM, while Grassl, Rio and Pink Kafir proliferated better on WU RM than  
253 on LG RM. Again, we never observed a better response within each genotype on LG RM when  
254 compared against WU RM. The poor performance of Chinese Amber explants is most likely a  
255 reflection of the extreme browning of the explants themselves, as this genotype exhibited a very  
256 pronounced response in which the explants became very soft and mushy.

257 In addition to callus proliferation, we also observed some medium browning responses  
258 during culture on RM (Fig. 3). While most genotypes exhibited minimal browning across LG RM  
259 and WU RM, the most intense medium browning was observed with Rio and Pink Kafir, with the  
260 response being minimal on LG RM, but extremely intense on WU RM. We noted that Grassl and

261 PI329311, which displayed significant browning on WU CIM, exhibited less browning on WU  
262 RM. As noted above for CIM culture, within each genotype comparison, we never observed a  
263 more intense browning response on LG when compared against WU; browning responses were  
264 either similar for a genotype on both RM media, or more intense on WU RM.

#### 265 *Performance following ERM culture*

266 Following four weeks on RM, all explants were transferred to a growth regulator-free  
267 elongation and rooting medium (ERM) to allow plantlet elongation and rooting. After two weeks  
268 on ERM, explants were assessed for final performance metrics. Analysis of the overall survival  
269 rate (Fig. 4a) revealed no significant difference between any genotype cultured using the LG  
270 protocol. While Tx430 and PI329311 displayed the highest survival rates (100%) and Rio the  
271 lowest (50%), there was sufficient variability in survival across experiments to confer no  
272 significant differences. Using the WU protocol, we again noted that the highest survival rates were  
273 with PI329311 (99%) and Tx430 (87%), and the lowest with Chinese Amber (37%). Most of the  
274 genotypes were not significantly different from each other with respect to survival, except for  
275 PI329311, which was significantly greater than Chinese Amber. No significant difference in  
276 explant survival was observed within each genotype between LG and WU protocols.

277 In contrast to explant survival, some significant differences in the percentage of explants  
278 exhibiting regeneration were observed (Fig. 4b). Using the LG protocol, several genotypes  
279 (Tx430, Atlas, PI329311, Leoti) displayed an average of 60%-70% explants with regeneration.  
280 The poorest genotype response was from Chinese Amber, with an average of 21% explants  
281 displaying regeneration. Using the WU protocol, most of the genotypes (Atlas, Grassl, Rio,  
282 PI329311, Leoti) displayed an average of 91%-98% explant regeneration, and all were  
283 significantly better than Tx430 (66%). The poorest genotype response was from Chinese Amber  
284 (11%), which was significantly lower than all other genotypes using the WU protocol. We noted  
285 that all genotypes cultured using the LG protocol exhibited higher amounts of variability across  
286 experiments, while the variability was much less with the WU protocol. When comparing within  
287 genotype for both protocols, apart from genotypes Tx430 and Chinese Amber, the average  
288 percentage of explants showing regeneration was consistently greater with the WU protocol,  
289 although the only significant difference observed was with Pink Kafir.

290           When we determined the mean number of regenerants produced per responding explant,  
291 distinct differences were observed for genotype and media combinations (Fig. 5). All genotypes  
292 using the LG protocol were similar in regenerant production, with approximately two regenerants  
293 per responding explants, and no significant differences observed. In contrast, for the WU protocol,  
294 the mean number of regenerants was the greatest for Rio, PI329311, and Leoti, with Rio and  
295 PI329311 significantly greater than Tx430, Atlas, Grassl, Pink Kafir and Chinese Amber. In all  
296 genotypes, except for Chinese Amber, regeneration using the WU protocol was significantly better  
297 than from LG (Fig. 5). We also observed continued medium browning during this phase of plantlet  
298 development and growth. Grassl, Rio and Pink Kafir displayed more medium browning (Fig. 5b),  
299 with the degree of medium browning observed with regenerants on WU ERM either similar to, or  
300 greater than observed on LG ERM.

301           During the plantlet regeneration process, we observed instances of albino plantlet  
302 development (Fig. 6), but only from three of the genotypes (Grassl, Rio, Pink Kafir). Furthermore,  
303 for these genotypes, the overwhelming majority of albino formation occurred using the WU  
304 protocol. Grassl exhibited minimal levels of albino regenerants on both LG and WU protocols, but  
305 Rio and Pink Kafir only formed albinos on the WU protocol. Pink Kafir formed albinos at a  
306 significantly higher frequency, with almost 25% of regenerating explants forming albino plantlets.  
307 Therefore, the WU protocol was much more supportive of albino formation in genotypes  
308 susceptible to this form of mutation.

309

## 310 **Discussion**

311           Plant tissue culture responsiveness is impacted by a variety of factors, including genotype,  
312 culture medium, growth regulators and culture environment (Loyola-Vargas and Ochoa-Alejo  
313 2018). While some plants respond easily to in vitro manipulation (e.g., carrot, tobacco), sorghum  
314 is generally considered to be a recalcitrant species in tissue culture. Hence, an understanding of  
315 the determinants of in vitro responsiveness will facilitate an expansion of this capability. In order  
316 to address this, we used a diverse subset of genotypes from the BAP (Brenton et al. 2016), which  
317 have been used as parental genotypes to create recombinant inbred line NAM populations. The  
318 ultimate goal will be to use these various populations to screen for the underlying genetic  
319 determinants based on segregation of parental traits.

320 Testing these NAM parental genotypes against the commonly-used grain genotype Tx430  
321 as a reference, in combination with two different in vitro propagation protocols, allowed an  
322 assessment of genotype and protocol effects on various steps of the in vitro regeneration process.  
323 All genotypes displayed some level of response during in vitro culture with both protocols, as  
324 indicated by callus induction, callus proliferation, medium browning, explant survival and plantlet  
325 regeneration phenotypes. There were genotypic effects on the various responses, with Chinese  
326 Amber the poorest overall genotype of those tested, and most genotypes performed as well, if not  
327 better, than Tx430. Furthermore, the overall results indicated that the WU protocol was superior  
328 to LG for all genotypes tested, with the exception of Chinese Amber, indicating in vitro protocol  
329 x genotype interactions. As we observed, tissue culture in sorghum, as well as other plants, is  
330 highly genotype-dependent, with varying responses observed from different genotypes (Cai et al.  
331 1987, Elkonin et al. 1995, Kaeppeler and Pedersen 1997, Liu et al. 2015, Omer et al. 2018).

332 The ability to predict in vitro performance of a genotype using an easily scored phenotype  
333 would be valuable. Sato et al. (2004) reported that the induction of browning during sorghum  
334 culture was a reliable indicator of poor embryogenic response. As browning is due to phenolic  
335 compound oxidation, an indicator of phenolic content might serve as a phenotype correlated with  
336 in vitro regeneration capacity. Phenolic tannins in the testa can contribute to seed coat color (Clará  
337 Valencia and Rooney 2009), suggesting that seed coat color and tannin accumulation may be  
338 potential indicators of in vitro responsiveness. Chakraborti and Ghosh (2010) reported that freshly  
339 harvested sesame seed coat color was associated with in vitro regeneration capacity, while with  
340 soybean, no relationship between embryogenic regeneration and seed coat color was noted (Ranch  
341 et al. 1985). This current work did not reveal any distinct relationship between seed coat color,  
342 tannin accumulation and regeneration response, as the three best regenerating genotypes were Rio  
343 (white seed with tannin), PI329311 (yellow seed with no tannin) and Leoti (brown seed with  
344 tannin). Sato et al (2004) also suggested that plant color (purple or tan) due to pigmentation  
345 induced under stress conditions was a marker of regenerability, with tan plants the best, and purple  
346 plants less so. In this current study, all genotypes represented purple pigmentation types, but with  
347 very distinct differences in regenerability, suggesting other significant factors are important in  
348 determining in vitro responsiveness.

349           The initial culture period on CIM is critical to establish the embryogenically-competent  
350 tissue needed for further differentiation and development. While all genotypes formed scutellar  
351 callus on CIM, it is possible that CIM composition differences between the two protocols had a  
352 subsequent impact on regeneration. Plant growth regulators are required for callus induction, and  
353 while both LG and WU CIM contained 1 mg/L 2,4-D as the auxin source, WU CIM also contained  
354 the cytokinin BA (0.5 mg/L). An analysis of several published sorghum studies has shown that  
355 their CIM always includes 2,4-D as the auxin source (Elkonin et al. 1995, Carvalho et al. 2004,  
356 Howe et al. 2006, Nguyen et al. 2007, Gurel et al. 2012, Chen et al. 2015, Do et al. 2016, Omer et  
357 al. 2018), sometimes combined with a cytokinin like BA (Belide et al. 2017, Espinoza-Sanchez et  
358 al. 2018) or KIN (Wernicke and Brettell 1980, Kaeppler and Pedersen 1997).

359           In addition, a key aspect of the WU regeneration protocol was the use of ABA. A survey  
360 of various sorghum somatic embryogenesis studies (Elkonin et al. 1995, Kaeppler and Pedersen  
361 1997, Seetharama et al. 2000, Gurel et al. 2012, Liu and Godwin 2012, Assem et al. 2014, Wu et  
362 al. 2014, Do et al. 2016, Visarada et al. 2016, Belide et al. 2017) indicated that the inclusion of  
363 auxin(s) and cytokinin(s) are standard for regeneration, but few use ABA for embryo  
364 maturation/regeneration (Assem et al. 2014, Wu et al. 2014, Belide et al. 2017). ABA is known to  
365 promote better embryogenic responses, with higher quality embryo formation, and subsequent  
366 plantlet conversion (Merkle et al. 1995), so the superior performance of explants with the WU  
367 protocol may also reflect the inclusion of ABA during regeneration.

### 368 *Medium browning*

369           An early response characteristic observed during the initial two-week period on CIM was  
370 the production and release of phenolic compounds, as indicated by the medium browning response.  
371 Distinct genotype and medium response profiles were noted, with some genotypes showing  
372 relatively little browning (e.g., Tx430, Atlas, Leoti), while other genotypes displayed much more  
373 browning (e.g., Grassl, Rio, Pink Kafir, PI329311, Chinese Amber). Furthermore, for some  
374 genotypes, WU CIM was much more promotive of the browning response (e.g., Tx430, Atlas,  
375 PI329311) than LG CIM. This impact of tissue culture medium on the level of browning response  
376 is attributed to the presence or absence of certain components that either serve as antioxidants to  
377 inhibit oxidative stress and phenolic oxidation or that serve as phenolic compound adsorbents to  
378 reduce their availability and toxicity (Ahmad et al. 2013, Jones and Saxena 2013). When

379 comparing within each genotype for culture response on LG or WU CIM, the degree of browning  
380 was either similar between the two media for a genotype, or browning was greater using WU CIM;  
381 LG CIM was never more promotive of browning than WU CIM within a genotype. The higher  
382 levels of proline, as well as the incorporation of asparagine in LG CIM, may have served an  
383 antioxidant function, helping to reduce browning in those genotypes more prone to phenolic  
384 production/exudation (Szabados and Savouré 2010, Signorelli 2016). The inclusion of proline and  
385 asparagine as suggested by Elkonin et al. (1995) served to alleviate medium browning with  
386 sorghum (Carvalho et al. 2004). Studies have shown a genotype effect on browning and phenolic  
387 exudation (Cai et al. 1987, Kaepler and Pedersen 1997), and higher browning is correlated with  
388 reduced sorghum embryogenic capacity (Kaepler and Pedersen 1997). However, Cai et al. (1987)  
389 noted that medium modifications allowed induction of regenerable embryogenic calli from high-  
390 tannin sorghum cultivars. These results, and the results of this current study showing superior  
391 regeneration from genotypes exhibiting extensive medium browning, suggest that phenolic  
392 production and oxidation may not necessarily be prohibitive to good regeneration, and that other  
393 factors are involved. Furthermore, while the non-tannin accumulating genotype Tx430 is often  
394 used due to the lack of browning in vitro, this current study noted that both seed tannin positive  
395 and negative genotypes exhibited browning in our experiments, suggesting that browning is not  
396 specific to genotypes showing seed tannin accumulation.

### 397 *Albino regeneration*

398 In vitro regeneration protocols have been reported as a source of somaclonal mutations  
399 during culture. We observed that three of our eight tested genotypes regenerated albino plantlets,  
400 and this was protocol dependent, with the WU protocol more prone to albino regenerant formation.  
401 The regeneration of albino plants during anther/inflorescence tissue culture has been reported for  
402 a variety of plants, including sorghum (Wen 1991; Can et al. 1998) rice (Park et al. 2013), triticale  
403 (Krzewska et al. 2015), barley (Sriskandarajah et al. 2015) and wheat (Zhao et al. 2017). In this  
404 current study, as well as that of Ma et al. (1987) and Wei and Xu (1990), albino regenerants were  
405 produced from non-reproductive tissue sorghum explants. In our study, of the three sorghum  
406 genotypes producing albino regenerants, Grassl showed the poorest response, with 2.2% of  
407 regenerating explants forming albinos when using the LG protocol, and a similar 1.5% of  
408 regenerating explants forming albinos when using the WU protocol. This was followed by Rio

409 (7.2% of regenerating explants using the WU protocol), and Pink Kafir (23.7% of regenerating  
410 explants using the WU protocol), thus illustrating the high susceptibility of Pink Kafir to  
411 mutagenesis during in vitro development. This impact of genotype on albino regeneration has been  
412 noted during other in vitro regeneration studies (Ayed et al. 2010; Khatun et al. 2010; Park et al.  
413 2013), as has the impact of the in vitro protocol used (Khatun et al. 2010; Park et al. 2013;  
414 Sriskandarajah et al. 2015; Dewir et al. 2018).

415 As explants cultured using both protocols were incubated in the same types of culture  
416 vessels and the same tissue culture chamber, our evidence of the WU protocol being more  
417 promotive of albino regeneration suggested that medium composition played a role in this  
418 response. Previous studies have shown that inclusion of casein hydrolysate reduced albinism  
419 during in vitro regeneration (Sriskandarajah et al. 2015), while the use of maltose as a carbohydrate  
420 source (Park et al. 2013), TDZ as a cytokinin source (Dewir et al. 2018) and copper supplements  
421 (Makowska et al. 2017) promoted albinism. While the WU protocol was more supportive of  
422 overall plantlet regeneration than LG, this protocol contained almost 8-fold higher levels of copper  
423 sulfate in both CIM and RM formulations, as well as the use of maltose in CIM, and TDZ in RM.  
424 Kumaravadivel and Rangasamy (1994) also noted an effect of RM growth regulator levels on  
425 albinism during plantlet regeneration. Using a sorghum anther culture system, the addition of 0.3  
426 mg/L IAA to 2.0 mg/L BA significantly increased albino plantlet frequency. In this current study,  
427 both LG and WU RM contained IAA at 1 mg/L. However, while LG RM also contained BA, WU  
428 RM contained TDZ, zeatin and ABA. Hence, these formulation differences from LG may  
429 contribute to albinism in susceptible genotypes, and suggests that further modification to the levels  
430 of these compounds in the WU protocol could potentially reduce albinism.

431 Albino plantlet regeneration is associated with aberrant plastid formation and plastidic  
432 DNA deletions (Day and Ellis 1984, Dunford and Walden 1991), altered expression of  
433 photosynthesis, porphyrin and chlorophyll metabolism genes (Zhao et al. 2017), global DNA  
434 methylation changes (Duarte-Aké et al. 2016), and modified physiology (Duarte-Aké et al. 2016;  
435 Isah 2019). Furthermore, QTL studies have identified 14 chromosome regions associated with  
436 albinism in triticale (Krzewska et al. 2015), which suggested a role for oxidative stress during the  
437 proplastid to functional chloroplast transition in the promotion of albinism during in vitro  
438 regeneration. However, the underlying reasons and genetic mechanisms controlling albino plantlet

439 formation in vitro remain to be identified. For example, how do the medium components described  
440 above interact with the genome to promote albinism? The characterization of new NAM parental  
441 lines with different susceptibility to albinism identified here under different culture conditions, as  
442 well as the availability of NAM populations derived from these various parents, provide new,  
443 additional resources to explore the genetic mechanisms underlying albino in vitro regeneration and  
444 development.

445 Several studies have targeted the genetic control of in vitro responsiveness in a variety of  
446 plants. Many have involved QTL identification (Bolibok and Rakoczy-Trojanowska 2006, Song  
447 et al. 2010, Tyagi et al. 2010, Trujillo-Moya et al. 2011, Yang et al. 2011, Krzewska et al. 2012,  
448 Li et al. 2013), and more recently, GWAS (Begheyn et al. 2018, Ma et al. 2018, Zhang et al. 2018).  
449 These studies have identified several genetic loci and candidate genes associated with various  
450 aspects of in vitro responsiveness. At present, the genes identified are associated with stress  
451 response regulation, cell fate change, embryogenesis and organogenesis, phytohormone  
452 metabolism and transport and chloroplast development. However, a full understanding of the suite  
453 of genes regulating in vitro responsiveness remain to be resolved, including those for sorghum.

454 The overall goal of this effort was to identify differential genotype-in vitro protocol  
455 responses across a variety of sorghum genotypes, in order to characterize response profiles for use  
456 in future genetic studies to identify determinants associated with in vitro regeneration. Seven NAM  
457 bioenergy sorghum genotypes and the common grain sorghum genotype Tx430 were assessed for  
458 their in vitro regeneration responses using LG and WU in vitro protocols, both previously  
459 successful with Tx430. All genotypes displayed some level of response during in vitro culture with  
460 both protocols, and distinct genotype-protocol responses were observed, with the WU protocol  
461 significantly better for plantlet regeneration. All bioenergy genotypes, with the exception of  
462 Chinese Amber, performed as well, if not better than Tx430. Genotypes displayed protocol-  
463 dependent, differential phenolic exudation responses, as indicated by medium browning. During  
464 the callus induction phase, genotypes prone to medium browning exhibited a response on WU  
465 medium which was either equal or greater than on LG medium. Genotype- and protocol-dependent  
466 albino plantlet regeneration was also noted, with three of the bioenergy genotypes showing albino  
467 plantlet regeneration, which was strongly associated with the WU protocol.



468           The NAM parental lines, coupled with the in vitro response characteristics described  
469 above, provide a new resource for bioenergy sorghum studies. These lines, as well as their  
470 respective recombinant inbred line populations, have been subjected to GBS, and unique molecular  
471 markers identified. The parental lines are currently in use for bioenergy (Brenton et al. 2016,  
472 Boyles et al. 2019), phytohormone (Sheflin et al. 2019), and plant-microbe interaction (Watts-  
473 Williams et al. 2019) studies. We anticipate that these parental genotypes, as well as their  
474 recombinant inbred line populations, will provide new resources and tools to identify/assess  
475 genetic loci, candidate genes, and allelic variants for their role in the regulation of in vitro  
476 responsiveness in sorghum.

#### 477 **Acknowledgements**

478           This work was supported by funds provided by the Clemson University Office of the Vice  
479 President for Research (to SK) as a component of US Department of Energy Award/Contract  
480 Number AR-0000595, as well as the Robert and Lois Coker Endowment Clemson University start-  
481 up funds (to SK).

482           The authors would like to thank Rick Boyles, Zach Brenton, Alex Cox, Matt Murphy and  
483 Matt Myers for their assistance with the provision of seeds, seed information, and/or the  
484 maintenance of plants in the greenhouse. The authors also thank Lindsay Shields for help with  
485 photography.

486

#### 487 **Compliance with ethical standards**

#### 488 **Conflict of interest**

489           We declare that we do not have any commercial or other interests that represent a conflict  
490 of interest in connection with the submitted work.

491

492

493

494

495 **References**

496 Ahmad I, Hussain T, Ashraf I, Nafees M, Maryam RM, Iqbal M (2013) Lethal effects of secondary  
497 metabolites on plant tissue culture. Am Eurasian J Agric Environ Sci 13:539-547.  
498 <https://doi.org/10.5829/idosi.aejaes.2013.13.04.1975>

499

500 Ali R, Hash CT, Damris O, Elhusein A, Mohamed AH (2016) Introgression of striga resistance  
501 into popular Sudanese sorghum varieties using marker assisted selection. World J Biotechnol 1:48-  
502 55. <https://doi.org/10.1234/wjb.v1i1.34>

503

504 Arikita FN, Azevedo MS, Scotton DC, de Siqueira Pinto M, Figueira A, Peres LE (2013) Novel  
505 natural genetic variation controlling the competence to form adventitious roots and shoots from  
506 the tomato wild relative *Solanum pennellii*. Plant Science 199:121-130.  
507 <https://doi.org/10.1016/j.plantsci.2012.11.005>

508

509 Asikin Y, Wada K, Imai Y, Kawamoto Y, Mizu M, Mutsuura M, Takahashi M (2018)  
510 Compositions, taste characteristics, volatile profiles, and antioxidant activities of sweet sorghum  
511 (*Sorghum bicolor* L.) and sugarcane (*Saccharum officinarum* L.) syrups. Food Measure 12:884-  
512 891. <https://doi.org/10.1007/s11694-017-9703-2>

513

514 Assem SK, Zamzam MM, Hussein BA (2014) Evaluation of somatic embryogenesis and plant  
515 regeneration in tissue culture of ten sorghum (*Sorghum bicolor* L.) genotypes. Afr J Biotechnol  
516 13: 3672-3681. <https://doi.org/10.5897/AJB2014.13924>

517

518 Ayed OS, De Buyser J, Picard E, Trifa Y, Amara HS (2010) Effect of pre-treatment on isolated  
519 microspores culture ability in durum wheat (*Triticum turgidum* subsp. *durum* Desf.). J Plant Breed  
520 Crop Sci 2:30-38

521

- 522 Begheyn RF, Yates SA, Sykes T, Studer B (2018) Genetic Loci Governing Androgenic Capacity  
523 in Perennial Ryegrass (*Lolium perenne* L.). *G3: Genes, Genomes, Genetics*. 8:1897-1908.  
524 <https://doi.org/10.1534/g3.117.300550>
- 525
- 526 Belide S, Vanhercke T, Petrie JR, Singh SP (2017) Robust genetic transformation of sorghum  
527 (*Sorghum bicolor* L.) using differentiating embryogenic callus induced from immature embryos.  
528 *Plant Methods* 13:109. <https://doi.org/10.1186/s13007-017-0260-9>
- 529
- 530 Bhaskaran S, Smith RH, Paliwal S, Schertz KF (1987) Somaclonal variation from *Sorghum bicolor*  
531 (L.) Moench cell culture. *Plant Cell Tissue Organ Cult* 9:189-196.  
532 <https://doi.org/10.1007/BF00040804>
- 533
- 534 Bolibok H, Rakoczy-Trojanowska M (2006) Genetic mapping of QTLs for tissue-culture response  
535 in plants. *Euphytica* 149:73-83. <https://doi.org/10.1007/s10681-005-9055-6>
- 536
- 537 Boyles RE, Brenton ZW, Kresovich S (2019) Genetic and genomic resources of sorghum to  
538 connect genotype with phenotype in contrasting environments. *Plant J* 97:19-39.  
539 <https://doi.org/10.1111/tpj.14113>
- 540
- 541 Boyles RE, Cooper EA, Myers MT, Brenton Z, Rauh BL, Morris GP, Kresovich S (2016) Genome-  
542 wide association studies of grain yield components in diverse sorghum germplasm. *The Plant*  
543 *Genome* 9:2. <https://doi.org/10.3835/plantgenome2015.09.0091>
- 544
- 545 Boyles RE, Pfeiffer BK, Cooper EA, Zielinski KJ, Myers MT, Rooney WL, Kresovich S (2017)  
546 Quantitative trait loci mapping of agronomic and yield traits in two grain sorghum biparental  
547 families. *Crop Sci* 57:2443-2456. <https://doi.org/10.2135/cropsci2016.12.0988>

548

549 Brenton ZW, Cooper EA, Myers MT, Boyles RE, Shakoor N, Zielinski KJ, Rauh BL, Bridges  
550 WC, Morris GP, Kresovich S (2016) A genomic resource for the development, improvement, and  
551 exploitation of sorghum for bioenergy. *Genetics* 204:21-33.  
552 <https://doi.org/10.1534/genetics.115.183947>

553

554 Cai T, Daly B, Butler L (1987) Callus induction and plant regeneration from shoot portions of  
555 mature embryos of high tannin sorghums. *Plant Cell Tiss Org Cult* 9:245-252.  
556 <https://doi.org/10.1007/BF00040810>

557

558 Can ND, Nakamura S, Haryanto TA, Yoshida T (1998) Effects of physiological status of parent  
559 plants and culture medium composition on the anther culture of sorghum. *Plant Prod Sci* 1:211-  
560 215. <https://doi.org/10.1626/pps.1.211>

561

562 Carvalho CH, Zehr UB, Gunaratna N, Anderson J, Kononowicz HH, Hodges TK, Axtell JD (2004)  
563 Agrobacterium-mediated transformation of sorghum: factors that affect transformation efficiency.  
564 *Genet Mol Biol* 27:259-269. <https://doi.org/10.1590/S1415-47572004000200022>

565

566 Chakaborti P, Ghosh A (2010) Variation in callus induction and root-shoot bud formation depend  
567 on seed coat of sesame genotypes. *Res J Bot* 5: 14-19. <https://doi.org/10.3923/rjb.2010.14.19>

568

569 Char SN, Wei J, Mu Q, Li X, Zhang ZJ, Yu J, Yang B (2019) An Agrobacterium-delivered  
570 CRISPR/Cas9 system for targeted mutagenesis in sorghum. *Plant Biotechnol J* x:1-3.  
571 <https://doi.org/10.1111/pbi.13229>

572

- 573 Chen X, Li O, Shi L, Wu X, Xia B, Pei Z (2015) To establish the regeneration system of sweet  
574 sorghum immature embryos. *Adv Appl Biotechnol* 333:83-91. [https://doi.org/10.1007/978-3-662-](https://doi.org/10.1007/978-3-662-46318-5_9)  
575 [46318-5\\_9](https://doi.org/10.1007/978-3-662-46318-5_9)
- 576
- 577 Chopra R, Burow G, Hayes C, Emendack Y, Xin Z, Burke J (2015) Transcriptome profiling and  
578 validation of gene based single nucleotide polymorphisms (SNPs) in sorghum genotypes with  
579 contrasting responses to cold stress. *BMC Genomics* 16:1040. [https://doi.org/10.1186/s12864-](https://doi.org/10.1186/s12864-015-2268-8)  
580 [015-2268-8](https://doi.org/10.1186/s12864-015-2268-8)
- 581
- 582 Clará Valencia R, Rooney WL (2009) Genetic Control of Sorghum Grain Color. INTSORMIL  
583 Presentation 10. <https://digitalcommons.unl.edu/intsormilpresent/10/>
- 584
- 585 Day AT, Ellis TH (1984) Chloroplast DNA deletions associated with wheat plants regenerated  
586 from pollen: possible basis for maternal inheritance of chloroplasts. *Cell* 39:359-368.  
587 [https://doi.org/10.1016/0092-8674\(84\)90014-X](https://doi.org/10.1016/0092-8674(84)90014-X)
- 588
- 589 Dewir YH, Naidoo Y, da Silva JA (2018) Thidiazuron-induced abnormalities in plant tissue  
590 cultures. *Plant Cell Rep* 37:1451-1470. <https://doi.org/10.1007/s00299-018-2326-1>
- 591
- 592 Disasa T, Feyissa T, Admassu B, Fetene M, Mendu V (2018) Mapping of QTLs associated with  
593 brix and biomass-related traits in Sorghum using SSR Markers. *Sugar Tech* 20:275-285.  
594 <https://doi.org/10.1007/s12355-018-0590-6>
- 595
- 596 Do PT, Lee H, Mookkan M, Folk WR, Zhang ZJ (2016) Rapid and efficient Agrobacterium-  
597 mediated transformation of sorghum (*Sorghum bicolor*) employing standard binary vectors and  
598 bar gene as a selectable marker. *Plant Cell Rep* 35:2065-2076. [https://doi.org/10.1007/s00299-](https://doi.org/10.1007/s00299-016-2019-6)  
599 [016-2019-6](https://doi.org/10.1007/s00299-016-2019-6)

600

601 Dreger M, Mól R, Deja A, Raj E, Mańkowska G, Wielgus K. Improved plant regeneration in callus  
602 cultures of *Sorghum bicolor* (L.) Moench (2019) *In Vitro Cell Dev Biol Plant* 55:190-198.  
603 <https://doi.org/10.1007/s11627-019-09963-9>

604

605 Duarte-Aké F, Castillo-Castro E, Pool FB, Espadas F, Santamaría JM, Robert ML, De-la-Peña C  
606 (2016) Physiological differences and changes in global DNA methylation levels in *Agave*  
607 *angustifolia* Haw. albino variant somaclones during the micropropagation process. *Plant Cell Rep*  
608 35:2489-2502. <https://doi.org/10.1007/s00299-016-2049-0>

609

610 Dunford R, Walden RM (1991) Plastid genome structure and plastid-related transcript levels in  
611 albino barley plants derived from anther culture. *Curr Genet* 20:339-347.  
612 <https://doi.org/10.1007/BF00318524>

613

614 Elkonin LA, Lopushanskaya RF, Pakhomova NV (1995) Initiation and maintenance of friable,  
615 embryogenic callus of sorghum (*Sorghum bicolor* (L.) Moench) by amino acids. *Maydica* 40:153-  
616 157

617

618 Espinoza-Sánchez EA, Sánchez-Peña YA, Torres-Castillo JA, García-Zambrano EA, Ramírez JT,  
619 Zavala-García F, Sinagawa-García SR (2018) Somatic embryogenesis induction from immature  
620 embryos of *Sorghum bicolor* L.(Moench). *Phyton-Int J Exp Bot* 87:105-112

621

622 Food and Agriculture Organization of the United Nations (2017) FAOSTAT Database. Rome,  
623 Italy: FAO. Retrieved August 28, 2019 from <http://faostat3.fao.org/home/E>

624

- 625 Garzón AG, Drago SR (2018) Aptitude of sorghum (*Sorghum bicolor* (L) Moench) hybrids for  
626 brewery or bio-functional malted beverages. *J Food Biochem* 42:e12692.  
627 <https://doi.org/10.1111/jfbc.12692>
- 628
- 629 Gurel S, Gurel E, Miller TI, Lemaux PG (2012) Agrobacterium-mediated transformation of  
630 *Sorghum bicolor* using immature embryos. *Methods Mol Biol* 847:109-122.  
631 [https://doi.org/10.1007/978-1-61779-558-9\\_10](https://doi.org/10.1007/978-1-61779-558-9_10)
- 632
- 633 Howe A, Sato S, Dweikat I, Fromm M, Clemente T (2006) Rapid and reproducible  
634 Agrobacterium-mediated transformation of sorghum. *Plant Cell Rep* 25:784-791.  
635 <https://doi.org/10.1007/s00299-005-0081-6>
- 636
- 637 Isah T (2019) Changes in the biochemical parameters of albino, hyperhydric and normal green  
638 leaves of *Caladium bicolor* cv. “Bleeding hearts” in vitro long-term cultures. *J. Photochem*  
639 *Photobiol B* 191:88-98. <https://doi.org/10.1016/j.jphotobiol.2018.12.017>
- 640
- 641 Jones AM, Saxena PK (2013) Inhibition of phenylpropanoid biosynthesis in *Artemisia annua* L.:  
642 a novel approach to reduce oxidative browning in plant tissue culture. *PloS ONE* 8:e76802.  
643 <https://doi.org/10.1371/journal.pone.0076802>
- 644
- 645 Kaeppler HF, Pedersen JF (1997) Evaluation of 41 elite and exotic inbred Sorghum genotypes for  
646 high quality callus production. *Plant Cell Tissue Organ Cult* 48:71-75.  
647 <https://doi.org/10.1023/A:1005765009568>
- 648
- 649 Kebede H, Subudhi PK, Rosenow DT, Nguyen HT (2001) Quantitative trait loci influencing  
650 drought tolerance in grain sorghum (*Sorghum bicolor* L. Moench). *Theor Appl Genet* 103:266-  
651 276. <https://doi.org/10.1007/s001220100541>

- 652
- 653 Khatun R, Islam SS, Bari MA (2010) Studies on plant regeneration efficiency through in vitro  
654 micropropagation and anther culture of twenty-five rice cultivars in Bangladesh. *J Appl Sci Res*  
655 6:1705-1711
- 656
- 657 Khazaeian A, Ashori A, Dizaj MY (2015) Suitability of sorghum stalk fibers for production of  
658 particleboard. *Carbohydr Polym* 120:15-21. <https://doi.org/10.1016/j.carbpol.2014.12.001>
- 659
- 660 Krzewska M, Czyczyło-Mysza I, Dubas E, Gołębiowska-Pikania G, Golemic E, Stojalowski S,  
661 Chrupek M, Żur I (2012) Quantitative trait loci associated with androgenic responsiveness in  
662 triticale ( $\times$  *Triticosecale* Wittm.) anther culture. *Plant Cell Rep* 31:2099-2108.  
663 <https://doi.org/10.1007/s00299-012-1320-2>
- 664
- 665 Krzewska M, Czyczyło-Mysza I, Dubas E, Gołębiowska-Pikania G, Żur I (2015) Identification of  
666 QTLs associated with albino plant formation and some new facts concerning green versus albino  
667 ratio determinants in triticale ( $\times$  *Triticosecale* Wittm.) anther culture. *Euphytica* 206:263-278.  
668 <https://doi.org/10.1007/s10681-015-1509-x>
- 669
- 670 Kumaravadivel NS, Rangasamy SS (1994) Plant regeneration from sorghum anther cultures and  
671 field evaluation of progeny. *Plant Cell Rep* 13:286-290. <https://doi.org/10.1007/BF00233321>
- 672
- 673 Li S, Yan S, Wang AH, Zou G, Huang X, Han B, Qian Q, Tao Y (2013) Identification of QTLs associated  
674 with tissue culture response through sequencing-based genotyping of RILs derived from 93-11 $\times$   
675 Nipponbare in rice (*Oryza sativa*). *Plant Cell Rep* 32:103-116. <https://doi.org/10.1007/s00299-012-1345-6>
- 676
- 677 Liu G, Gilding EK, Godwin ID (2015) A robust tissue culture system for sorghum [*Sorghum bicolor* (L.)  
678 Moench]. *S Afr J Bot* 98:157-160. <https://doi.org/10.1016/j.sajb.2015.03.179>



679

680 Liu G, Godwin ID (2012) Highly efficient sorghum transformation. *Plant Cell Rep* 31:999-1007.  
681 <https://doi.org/10.1007/s00299-011-1218-4>

682

683 Lowe K, Wu E, Wang N, Hoerster G, Hastings C, Cho MJ, Scelonge C, Lenderts B, Chamberlin  
684 M, Cushatt J, Wang L, Ryan L, Khan T, Chow-Yiu J, Hua W, Yu M, Banh J, Bao Z, Brink K, Igo  
685 E, Rudrappa B, Shamseer PM, Bruce W, Newman L, Shen B, Zheng P, Bidney D, Falco C,  
686 Register J, Zhao ZY, Xu D, Jones T, Gordon-Kamm W (2016) Morphogenic regulators *Baby boom*  
687 and *Wuschel* improve monocot transformation. *Plant Cell* 28:1998-2015.  
688 <https://doi.org/10.1105/tpc.16.00124>

689

690 Loyola-Vargas VM, Ochoa-Alejo N (2018) An introduction to plant tissue culture: advances and  
691 perspectives. In *Plant Cell Culture Protocols*, Humana Press, New York, NY. pp. 3-13.  
692 [https://doi.org/10.1007/978-1-4939-8594-4\\_1](https://doi.org/10.1007/978-1-4939-8594-4_1)

693

694 Ma H, Gu M, Liang GH (1987) Plant regeneration from cultured immature embryos of *Sorghum*  
695 *bicolor* (L.) Moench. *Theoret Appl Genetics* 73:389-394. <https://doi.org/10.1007/BF00262506>

696

697 Ma L, Liu M, Yan Y, Qing C, Zhang X, Zhang Y, Long Y, Wang L, Pan L, Zou C, Li Z (2018)  
698 Genetic dissection of maize embryonic callus regenerative capacity using multi-locus genome-  
699 wide association studies. *Front Plant Sci* 9:561. <https://doi.org/10.3389/fpls.2018.00561>

700

701 Mabelebele M, Gous RM, O'Neil HM, Iji PA (2018) Whole sorghum inclusion and feed form on  
702 performance and nutrient digestibility of broiler chickens. *J Appl Anim Nutr* 6:e5.  
703 <https://doi.org/10.1017/JAN.2018.3>

704

- 705 Mace E, Innes D, Hunt C, Wang X, Tao Y, Baxter J, Hassall M, Hathorn A, Jordan D (2019) The  
706 Sorghum QTL Atlas: a powerful tool for trait dissection, comparative genomics and crop  
707 improvement. *Theor Appl Genet* 132:751-766. <https://doi.org/10.1007/s00122-018-3212-5>  
708
- 709 Makowska K, Oleszczuk S, Zimny J (2017) The effect of copper on plant regeneration in barley  
710 microspore culture. *Czech J Genet Plant Breed* 53:17-22. <https://doi.org/10.17221/82/2016->  
711 [CJGPB](https://doi.org/10.17221/82/2016-CJGPB)  
712
- 713 Merkle SA, Parrott WA, Flinn BS (1995) Morphogenic aspects of somatic embryogenesis. In:  
714 Thorpe TA (eds) *In Vitro Embryogenesis in Plants*. Springer, Dordrecht. pp. 155-203.  
715 [https://doi.org/10.1007/978-94-011-0485-2\\_5](https://doi.org/10.1007/978-94-011-0485-2_5)  
716
- 717 Mofokeng MA, Shimelis H, Laing M, Shargie N (2017) Sorghum ['Sorghum bicolor'(L.) Moench]  
718 breeding for resistance to leaf and stalk anthracnose, *Colletotrichum sublineolum*, and improved  
719 yield: Progress and prospects. *Aust J Crop Sci* 11:1078-1085.  
720 <https://doi.org/10.21475/ajcs.17.11.09.pne347>  
721
- 722 Murashige T, Skoog F (1962) A revised medium for rapid growth and bio assays with tobacco  
723 tissue cultures. *Physiol Plant* 15:473-497. <https://doi.org/10.1111/j.1399-3054.1962.tb08052.x>  
724
- 725 Nguyen TV, Thu TT, Claeys M, Angenon G (2007) Agrobacterium-mediated transformation of  
726 sorghum (*Sorghum bicolor* (L.) Moench) using an improved in vitro regeneration system. *Plant*  
727 *Cell Tissue Organ Cult* 91:155-164. <https://doi.org/10.1007/s11240-007-9228-1>  
728
- 729 Omer RA, Asami P, Birungi J (2018) Callus induction and plant regeneration from immature  
730 embryos of sweet sorghum (*Sorghum bicolor* Moench). *Biotechnology* 17:12-18.  
731 <https://doi.org/10.3923/biotech.2018.12.18>

732

733 Park SG, Ubaidillah M, Kim KM (2013) Effect of maltose concentration on plant regeneration of  
734 anther culture with different genotypes in rice (*Oryza sativa* L.). Am J Plant Sci 4:2265-2270.  
735 <https://doi.org/10.4236/ajps.2013.411279>

736

737 Paterson AH, Bowers JE, Bruggmann R, Dubchak I, Grimwood J, Gundlach H, Haberer G,  
738 Hellsten U, Mitros T, Poliakov A, Schmutz J (2009) The Sorghum bicolor genome and the  
739 diversification of grasses. Nature 457:551-556. <https://doi.org/10.1038/nature07723>

740

741 Ranch JP, Oglesby L, Zielinski AC, Horsch RB (1985) Plant regeneration from embryo-derived  
742 tissue cultures of soybeans. In Vitro Cell Dev Biol 21:653-658.  
743 <https://doi.org/10.1007/BF02623299>

744

745 Reddy PS, Jogeswar G, Rasineni GK, Maheswari M, Reddy AR, Varshney RK, Kishor PK (2015)  
746 Proline over-accumulation alleviates salt stress and protects photosynthetic and antioxidant  
747 enzyme activities in transgenic sorghum [*Sorghum bicolor* (L.) Moench]. Plant Physiol Biochem  
748 94:104-113. <https://doi.org/10.1016/j.plaphy.2015.05.014>

749

750 Rooney WL, Blumenthal J, Bean B, Mullet JE (2007) Designing sorghum as a dedicated bioenergy  
751 feedstock. Biofuel Bioprod Bior 1:147-157. <https://doi.org/10.1002/bbb.15>

752

753 Sato S, Clemente T, Dweikat I (2004) Identification of an elite sorghum genotype with high in  
754 vitro performance capacity. In Vitro Cell Dev Biol Plant 40:57-60.  
755 <https://doi.org/10.1079/IVP2003475>

756

757 Schindelin J, Arganda-Carreras I, Frise E, Kaynig V, Longair M, Pietzsch T, Preibisch S, Rueden  
758 C, Saalfeld S, Schmid B, Tinevez JY (2012) Fiji: an open-source platform for biological-image  
759 analysis. *Nat Methods*. 9:676-682. <https://doi.org/10.1038/nmeth.2019>

760

761 Seetharama N, Sairam RV, Rani TS (2000) Regeneration of sorghum from shoot tip cultures and  
762 field performance of the progeny. *Plant Cell Tissue Organ Cult* 61:169-173.  
763 <https://doi.org/10.1023/A:1006403601498>

764

765 Sheflin AM, Kirkwood JS, Wolfe LM, Jahn CE, Broeckling CD, Schachtman DP, Prenni JE  
766 (2019) High-throughput quantitative analysis of phytohormones in sorghum leaf and root tissue  
767 by ultra-performance liquid chromatography-mass spectrometry. *Anal Bioanal Chem* 16:1-0.  
768 <https://doi.org/10.1007/s00216-019-01658-9>

769

770 Signorelli S (2016) The fermentation analogy: a point of view for understanding the intriguing role  
771 of proline accumulation in stressed plants. *Frontiers in Plant Science* 7:1339.  
772 <https://doi.org/10.3389/fpls.2016.01339>

773

774 Song X, Han Y, Teng W, Sun G, Li W (2010) Identification of QTL underlying somatic  
775 embryogenesis capacity of immature embryos in soybean (*Glycine max* (L.) Merr.). *Plant Cell*  
776 *Rep* 29:125-131. <https://doi.org/10.1007/s00299-009-0804-1>

777

778 Sriskandarajah S, Sameri M, Lerceteau-Köhler E, Westerbergh A (2015) Increased recovery of  
779 green doubled haploid plants from barley anther culture. *Crop Sci* 55:2806-2812.  
780 <https://doi.org/10.2135/cropsci2015.04.0245>

781

782 Szabados L, Savoure A (2010) Proline: a multifunctional amino acid. *Trends in Plant Science*  
783 15:89-97. <https://doi.org/10.1016/j.tplants.2009.11.009>

784

785 Trujillo-Moya C, Gisbert C, Vilanova S, Nuez F (2011) Localization of QTLs for in vitro plant  
786 regeneration in tomato. BMC Plant Biology 11:140. <https://doi.org/10.1186/1471-2229-11-140>

787

788 Tyagi N, Dahleen LS, Bregitzer P (2010) Candidate genes within tissue culture regeneration QTL  
789 revisited with a linkage map based on transcript-derived markers. Crop Sci 50:1697-1707.  
790 <https://doi.org/10.2135/cropsci2009.10.0624>

791

792 Vanamala JK, Massey AR, Pinnamaneni SR, Reddivari L, Reardon KF (2018) Grain and sweet  
793 sorghum (*Sorghum bicolor* L. Moench) serves as a novel source of bioactive compounds for  
794 human health. Crit Rev Food Sci Nutr 58:2867-2881.  
795 <https://doi.org/10.1080/10408398.2017.1344186>

796

797 Visarada KB, Prasad GS, Royer M (2016) Genetic transformation and evaluation of two sweet  
798 sorghum genotypes for resistance to spotted stemborer, *Chilo partellus* (Swinhoe). Plant  
799 Biotechnol Rep 10:277-289. <https://doi.org/10.1007/s11816-016-0404-9>

800

801 Watts-Williams SJ, Emmett BD, Levesque-Tremblay V, MacLean AM, Sun X, Satterlee JW, Fei  
802 Z, Harrison MJ (2019) Diverse *Sorghum bicolor* accessions show marked variation in growth and  
803 transcriptional responses to arbuscular mycorrhizal fungi. Plant Cell Environ 42:1758-1774.  
804 <https://doi.org/10.1111/pce.13509>

805

806 Wei ZM, Xu ZH (1990) Regeneration of fertile plants from embryogenic suspension culture  
807 protoplasts of *Sorghum vulgare*. Plant Cell Rep 9:51-53. <https://doi.org/10.1007/BF00232135>

808

809 Wen FS, Sorensen EL, Barnett FL, Liang GH (1991) Callus induction and plant regeneration from  
810 anther and inflorescence culture of sorghum. *Euphytica* 52:177-181.  
811 <https://doi.org/10.1007/BF00029394>

812

813 Wernicke W, Brettell R (1980) Somatic embryogenesis from *Sorghum bicolor* leaves. *Nature*  
814 287(5778):138-139. <https://doi.org/10.1038/287138a0>

815

816 Wu E, Lenderts B, Glassman K, Berezowska-Kaniewska M, Christensen H, Asmus T, Zhen S,  
817 Chu U, Cho MJ, Zhao ZY (2014) Optimized *Agrobacterium*-mediated sorghum transformation  
818 protocol and molecular data of transgenic sorghum plants. *In Vitro Cell Dev Biol Plant* 50:9-18.  
819 <https://doi.org/10.1007/s11627-013-9583-z>

820

821 Yang C, Zhao T, Yu D, Gai J (2011) Mapping QTLs for tissue culture response in soybean  
822 (*Glycine max* (L.) Merr.). *Mol Cells* 32:337-342. <https://doi.org/10.1007/s10059-011-0063-1>

823

824 Zhang Z, Zhao H, Li W, Wu J, Zhou Z, Zhou F, Chen H, Lin Y (2018) Genome-wide association  
825 study of callus induction variation to explore the callus formation mechanism of rice. *J Integr Plant*  
826 *Biol.* <https://doi.org/10.1111/jipb.12759>

827

828 Zhao P, Wang K, Zhang W, Liu HY, Du LP, Hu HR, Ye XG (2017) Comprehensive analysis of  
829 differently expressed genes and proteins in albino and green plantlets from a wheat anther culture.  
830 *Biol Plant* 61:255-265. <https://doi.org/10.1007/s10535-016-0662-y>

831

832

833

834

835

836 **Table 1** Sorghum genotypes used in this study

| 837 | Genotype                 | Sorghum    | Seed color/  | Plant  | Race          | Origin   |
|-----|--------------------------|------------|--------------|--------|---------------|----------|
| 838 | (Name and/or identifier) | type       | tannin       | color  |               | location |
| 839 |                          |            |              |        |               |          |
| 840 | Tx430                    | Grain      | Yellow/no    | Purple | Caudatum      | USA      |
| 841 | Atlas (PI641807)         | Sweet      | White/no     | Purple | Kafir-Bicolor | USA      |
| 842 | Grassl                   | Cellulosic | Brown/yes    | Purple | Caudatum      | Uganda   |
| 843 | Rio                      | Sweet      | White/yes    | Purple | Caudatum      | USA      |
| 844 | Pink Kafir (PI655972)    | Grain      | Red-white/no | Purple | Kafir         | USA      |
| 845 | PI329311                 | Cellulosic | Yellow/no    | Purple | Durra         | Ethiopia |
| 846 | Leoti (PI586454)         | Sweet      | Brown/yes    | Purple | Kafir         | Hungary  |
| 847 | Chinese Amber (PI22913)  | Sweet      | Brown/yes    | Purple | Bicolor       | China    |

848

849

850

851

852

853

854

855

856

857

858

859

860

861

862

863

864

865

866

867 **Table 2** Impact of genotype and protocol on callus proliferation and medium browning on RM

| 868 | Genotype      | Protocol | Proliferation index | Medium browning |
|-----|---------------|----------|---------------------|-----------------|
| 869 |               |          |                     |                 |
| 870 | Tx430         | LG       | ++++                | -               |
| 871 |               | WU       | ++++                | +               |
| 872 | Atlas         | LG       | ++                  | +               |
| 873 |               | WU       | +++                 | ++              |
| 874 | Grassl        | LG       | ++                  | +++             |
| 875 |               | WU       | +++                 | +++             |
| 876 | Rio           | LG       | ++                  | +               |
| 877 |               | WU       | +++                 | ++++            |
| 878 | Pink Kafir    | LG       | +++                 | +               |
| 879 |               | WU       | ++++                | ++++            |
| 880 | PI329311      | LG       | ++++                | +               |
| 881 |               | WU       | ++++                | ++              |
| 882 | Leoti         | LG       | +                   | ++              |
| 883 |               | WU       | +                   | ++              |
| 884 | Chinese Amber | LG       | +                   | +++             |
| 885 |               | WU       | +                   | +++             |

886

887

888

889

890

891

892

893

894

895



896 **Figure 1.** The in vitro tissue culture steps used for LG and WU protocols, leading to plantlet  
897 regeneration, with Tx430 shown as the representative genotype. Arrows denote individual  
898 explants enlarged in the right RM panel photo.

899

900 **Figure 2.** Impact of LG and WU CIM on medium browning from immature embryo explants of  
901 diverse sorghum genotypes, following two weeks of culture on CIM. a) Digital images were  
902 analyzed as described in the Materials and Methods, and plotted as the mean area per petri plate  
903 ( $\pm$  SE) exhibiting medium browning. b) Representative photos of petri plates for each genotype  
904 and protocol combination illustrating the levels of medium browning. Data shown in (a) were  
905 analyzed by one-way ANOVA, and tested for significance using Tukey's HSD Post-hoc Test. For  
906 comparisons across genotypes for LG CIM, those with the same lowercase letter are not  
907 significantly different at  $P \leq 0.05$ . For comparisons across genotypes for WU CIM, those with the  
908 same uppercase letter are not significantly different at  $P \leq 0.05$ . For comparisons across the two  
909 media within a genotype, those with the same asterisk pattern are not significantly different at  
910  $P \leq 0.05$ .

911

912 **Figure 3.** Impact of LG and WU RM on explant phenotype for the various genotypes, following  
913 four weeks of culture on RM. Representative photos of petri plates for each genotype and protocol  
914 combination illustrating the levels of callus proliferation and medium browning.

915

916 **Figure 4.** Impact of LG and WU protocols on overall explant response for the various genotypes.  
917 a) Percentage of total initial explants surviving following eight weeks in culture. Results are  
918 plotted as the mean of three independent experiments ( $\pm$  SE). b) Percentage of surviving explants  
919 exhibiting plantlet regeneration following eight weeks in culture. Results are plotted as the mean  
920 of three independent experiments ( $\pm$  SE). Data were analyzed by one-way ANOVA, and tested  
921 for significance using Tukey's HSD Post-hoc Test. For comparisons across genotypes for the LG  
922 protocol, those with the same lowercase letter are not significantly different at  $P \leq 0.05$ . For  
923 comparisons across genotypes for the WU protocol, those with the same uppercase letter are not

924 significantly different at  $P \leq 0.05$ . For comparisons across the two media within a genotype, those  
925 with the same asterisk pattern are not significantly different at  $P \leq 0.05$ .

926

927 **Figure 5.** Impact of LG and WU protocols on the regeneration response for the various genotypes.  
928 a) Mean number of regenerants per responding explant following eight weeks in culture. Results  
929 are plotted as the mean of three independent experiments ( $\pm$  SE). b) Representative images of  
930 cultures in Magenta boxes (12 explants per box) for each genotype and protocol combination,  
931 illustrating the levels of plantlet regeneration. Data shown in (a) were analyzed by one-way  
932 ANOVA, and tested for significance using Tukey's HSD Post-hoc Test. For comparisons across  
933 genotypes for the LG protocol, those with the same lowercase letter are not significantly different  
934 at  $P \leq 0.05$ . For comparisons across genotypes for the WU protocol, those with the same uppercase  
935 letter are not significantly different at  $P \leq 0.05$ . For comparisons across the two media within a  
936 genotype, those with the same asterisk pattern are not significantly different at  $P \leq 0.05$ .

937

938 **Figure 6.** Impact of LG and WU protocols on the incidence of albino regenerants for the various  
939 genotypes. a) Percentage of regenerating explants exhibiting albino plantlet regeneration,  
940 following eight weeks in culture. Results are plotted as the mean of three independent experiments  
941 ( $\pm$  SE). ND, not detected. b) Representative images of cultures for genotypes exhibiting albino  
942 regeneration for specific genotype and protocol combinations. Data shown in (a) were analyzed  
943 by one-way ANOVA, and tested for significance using Tukey's HSD Post-hoc Test. For  
944 comparisons across genotypes for the LG protocol, those with the same lowercase letter are not  
945 significantly different at  $P \leq 0.05$ . For comparisons across genotypes for the WU protocol, those  
946 with the same uppercase letter are not significantly different at  $P \leq 0.05$ . For comparisons across  
947 the two media within a genotype, those with the same asterisk pattern are not significantly different  
948 at  $P \leq 0.05$ .

**Excised embryos  
(14 DAP)**

**Callus Induction Medium  
(CIM) for 2 weeks**

**Regeneration Medium  
(RM) for 4 weeks**

**Elongation/Rooting  
Medium (ERM) for 2 weeks**

**LG**

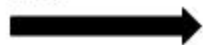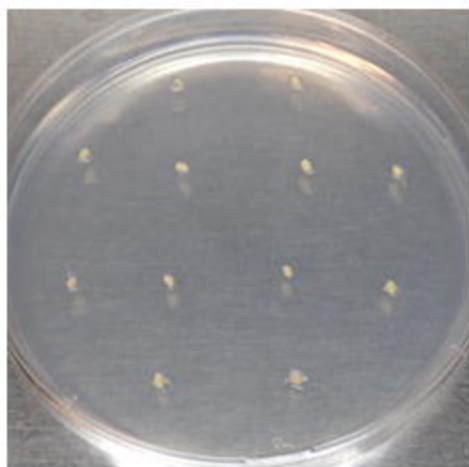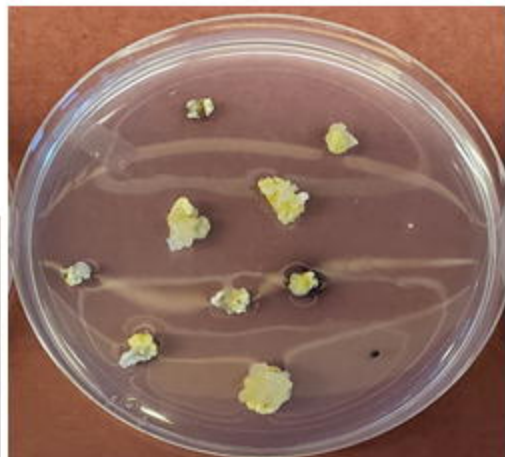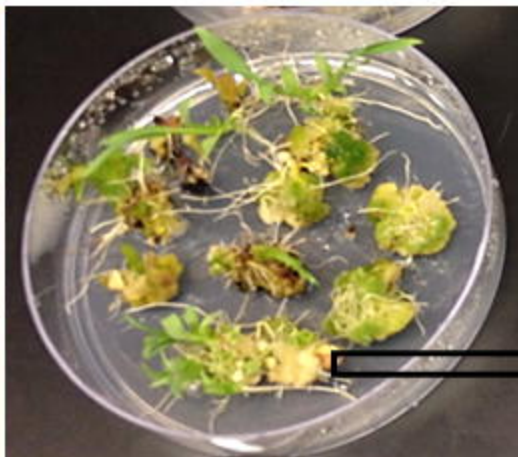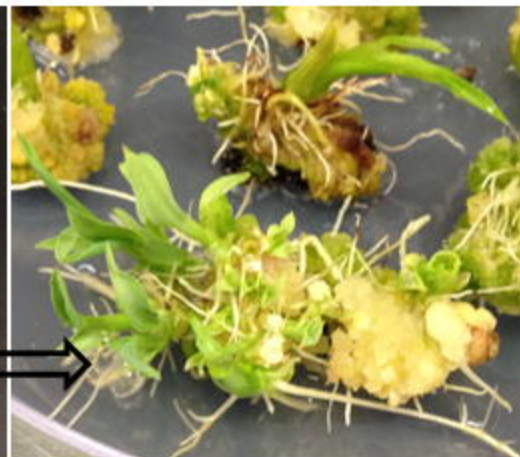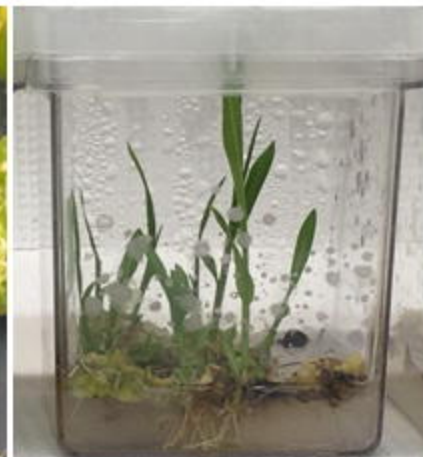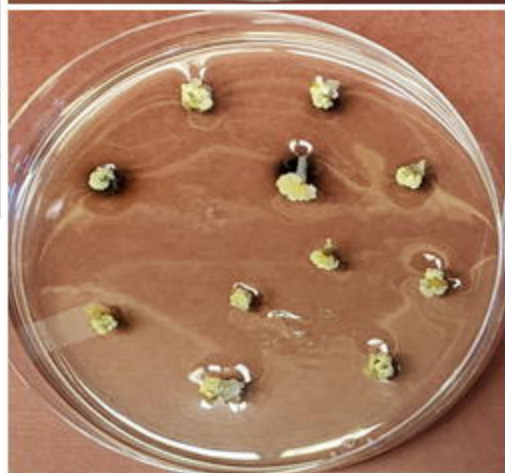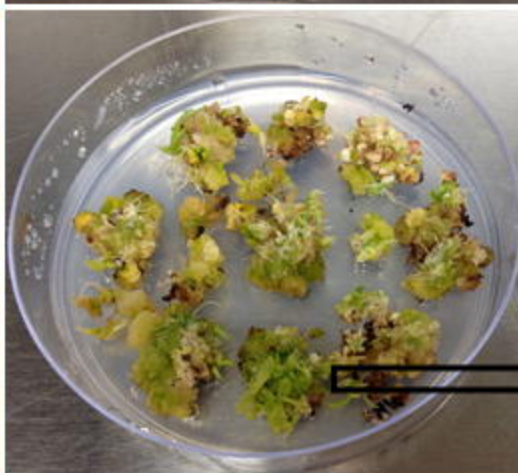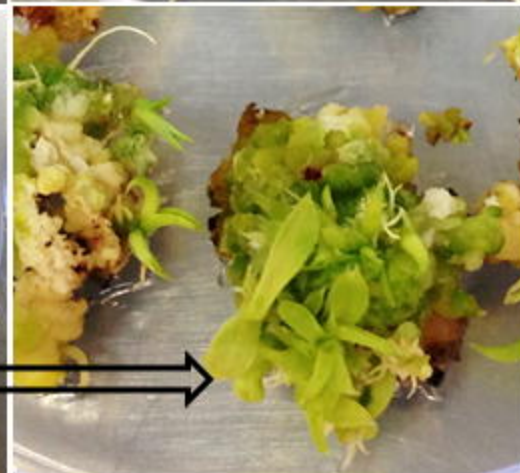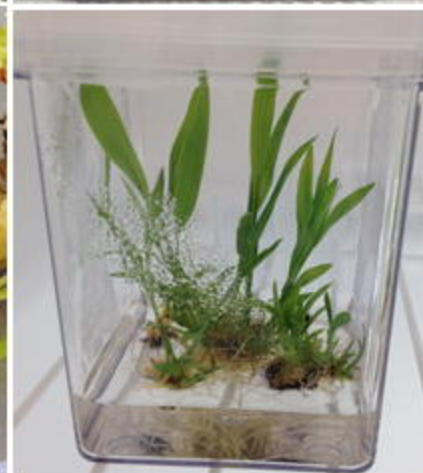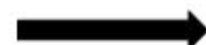

**WU**

**a**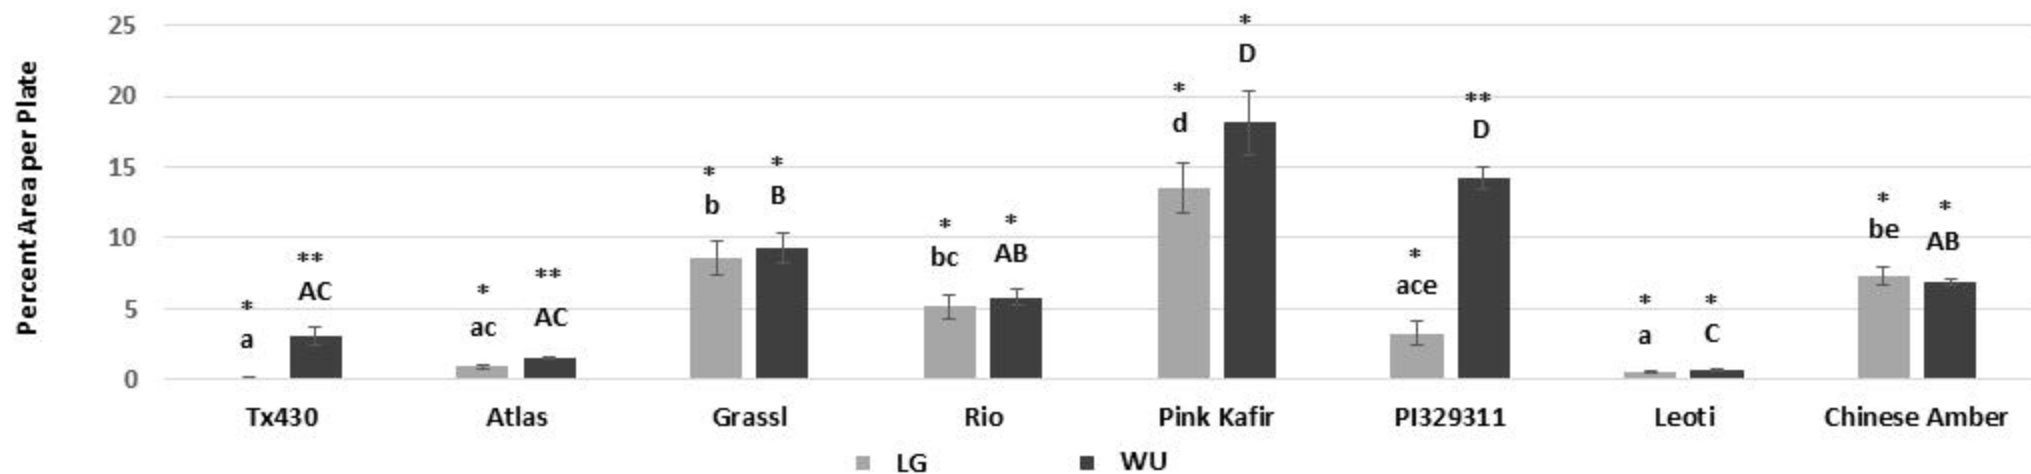**b**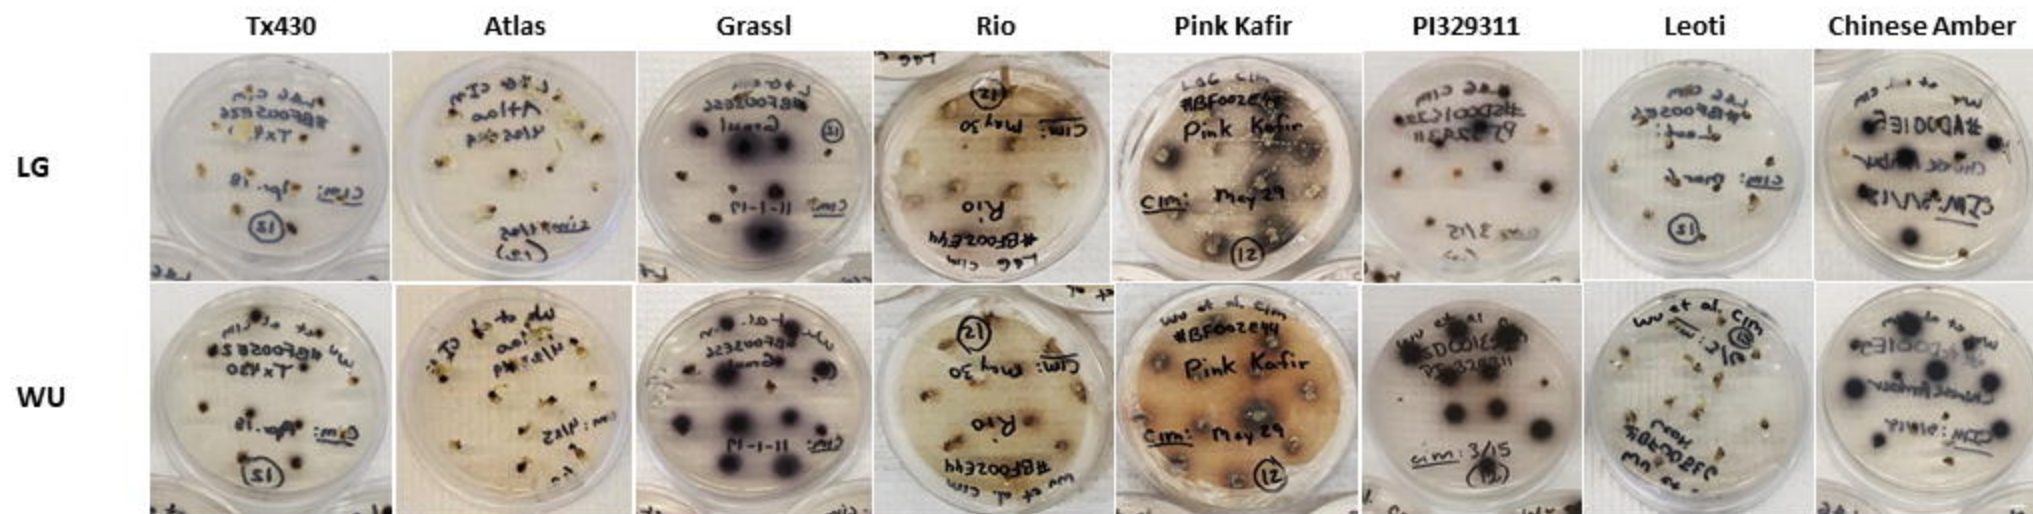

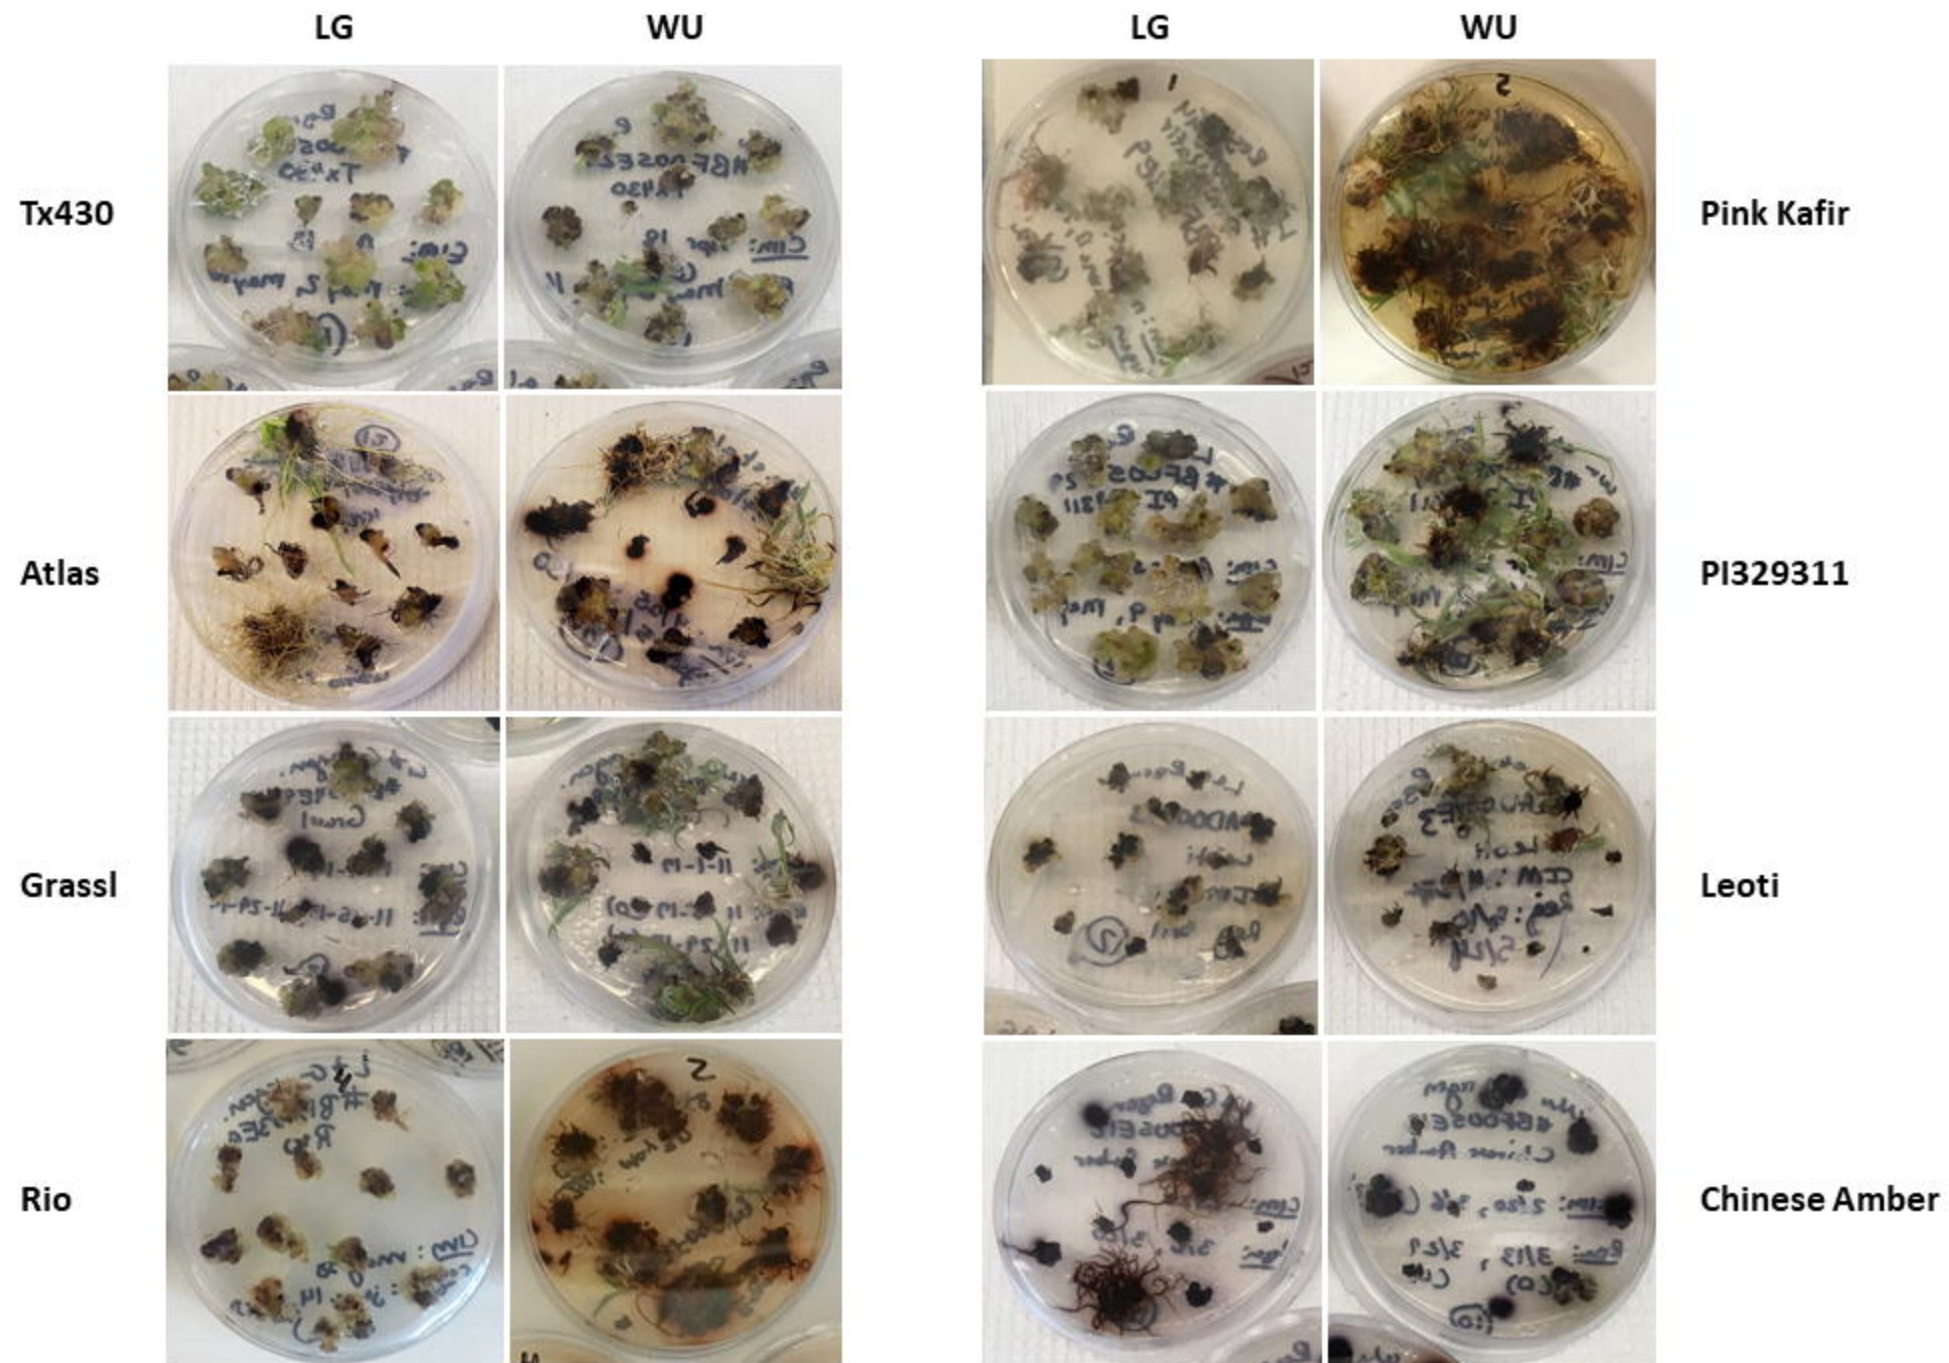

**a**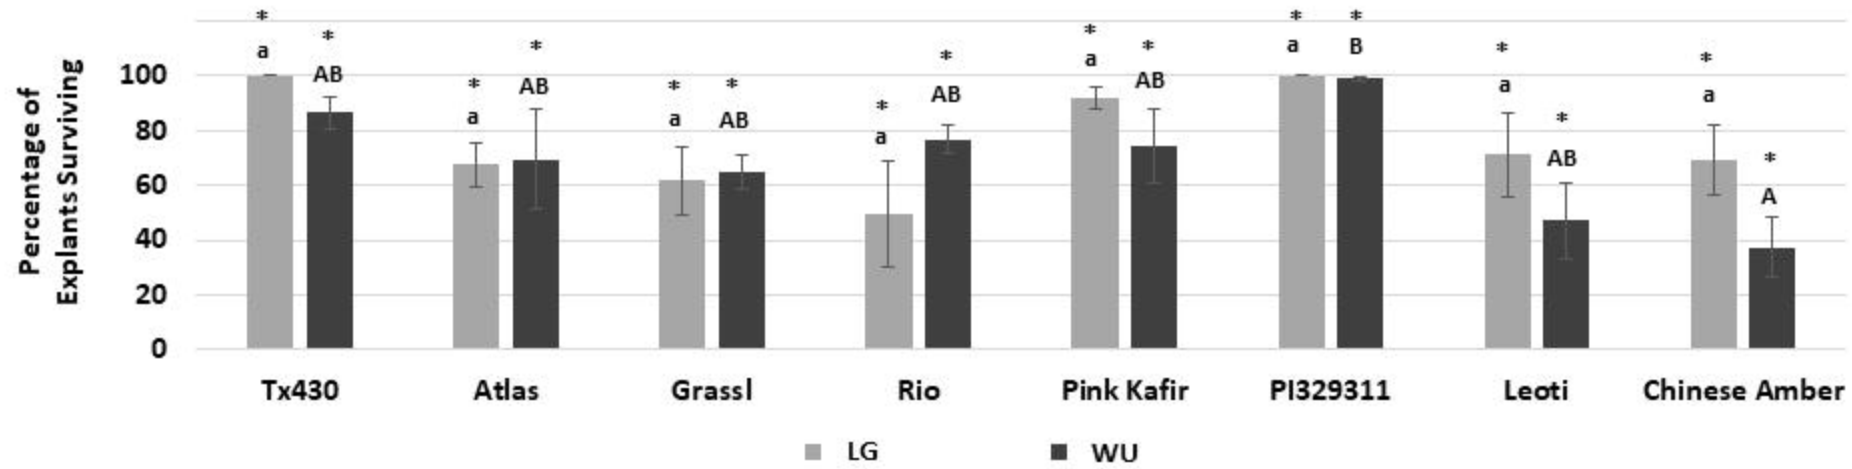**b**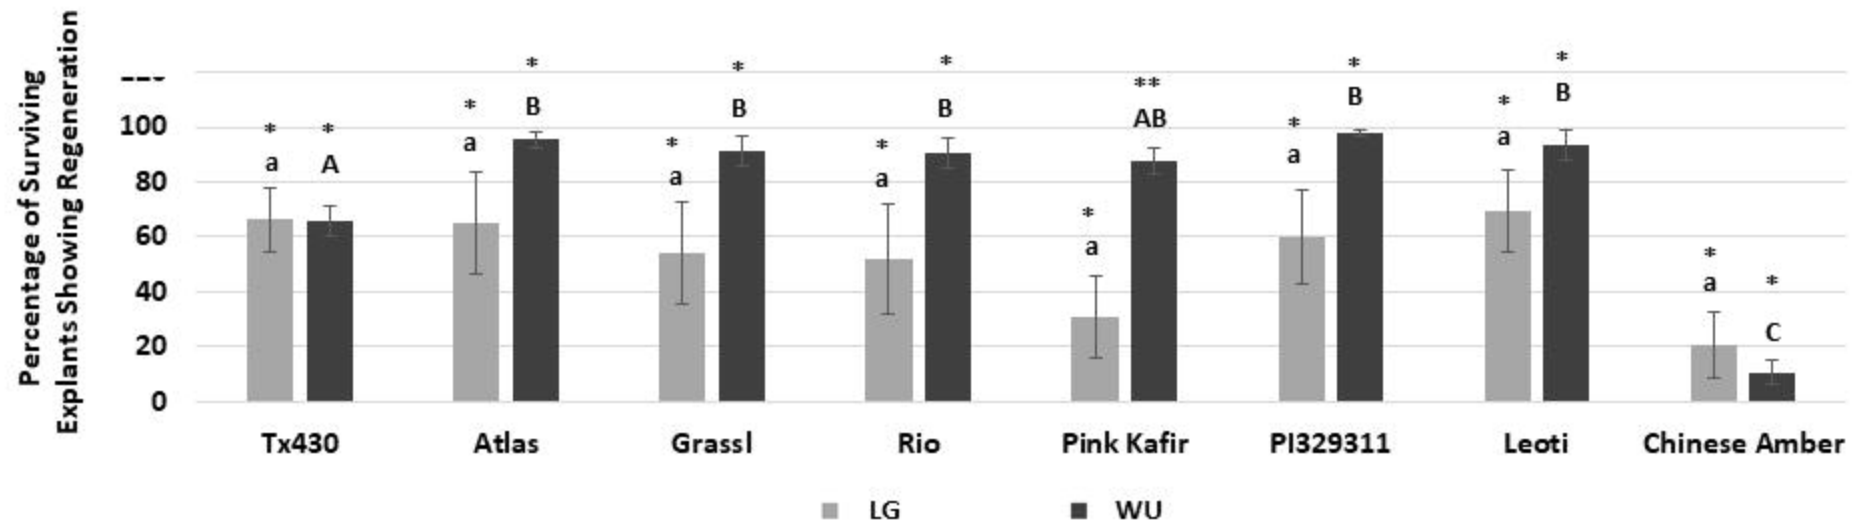

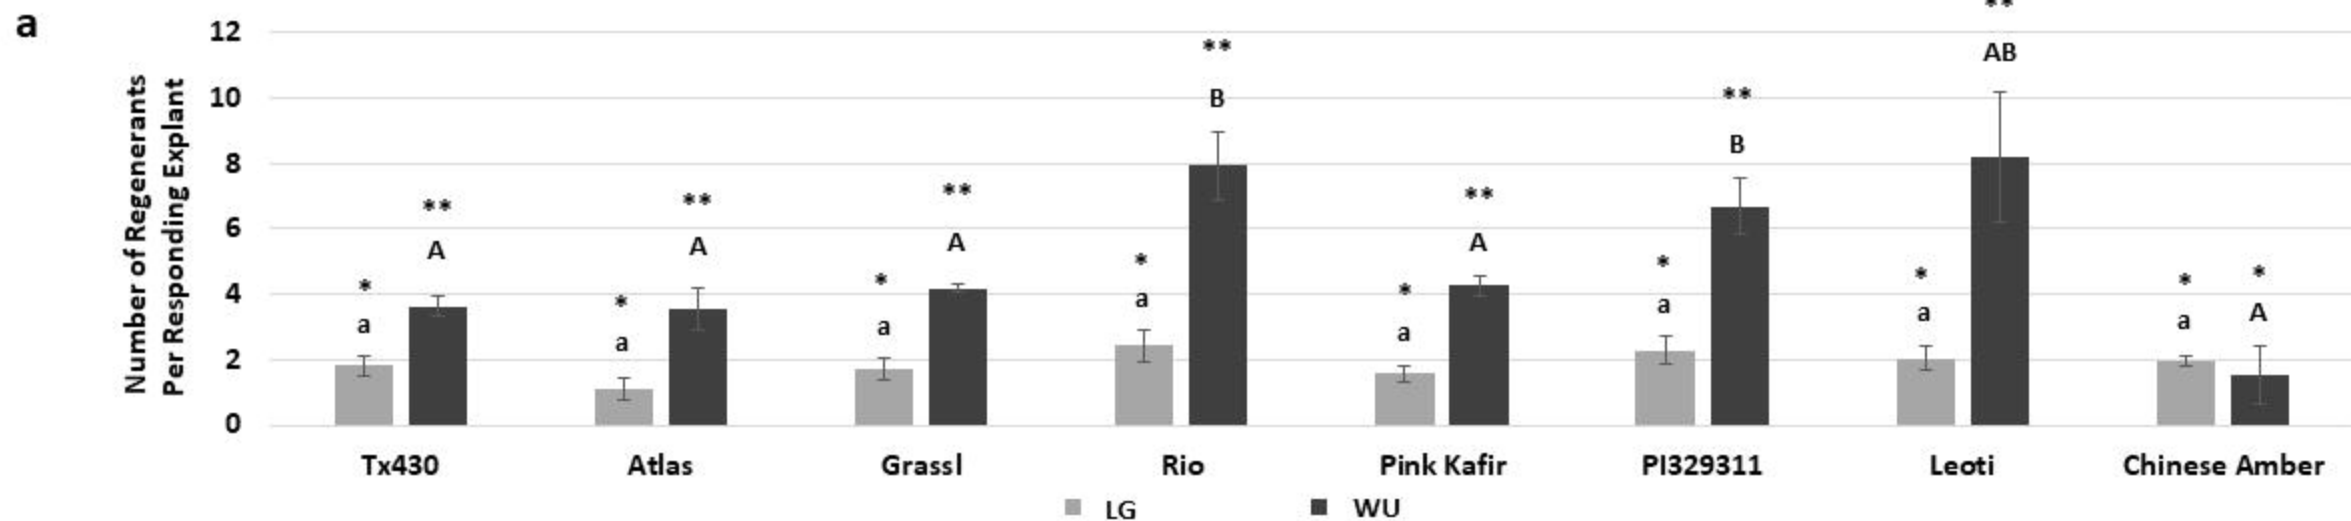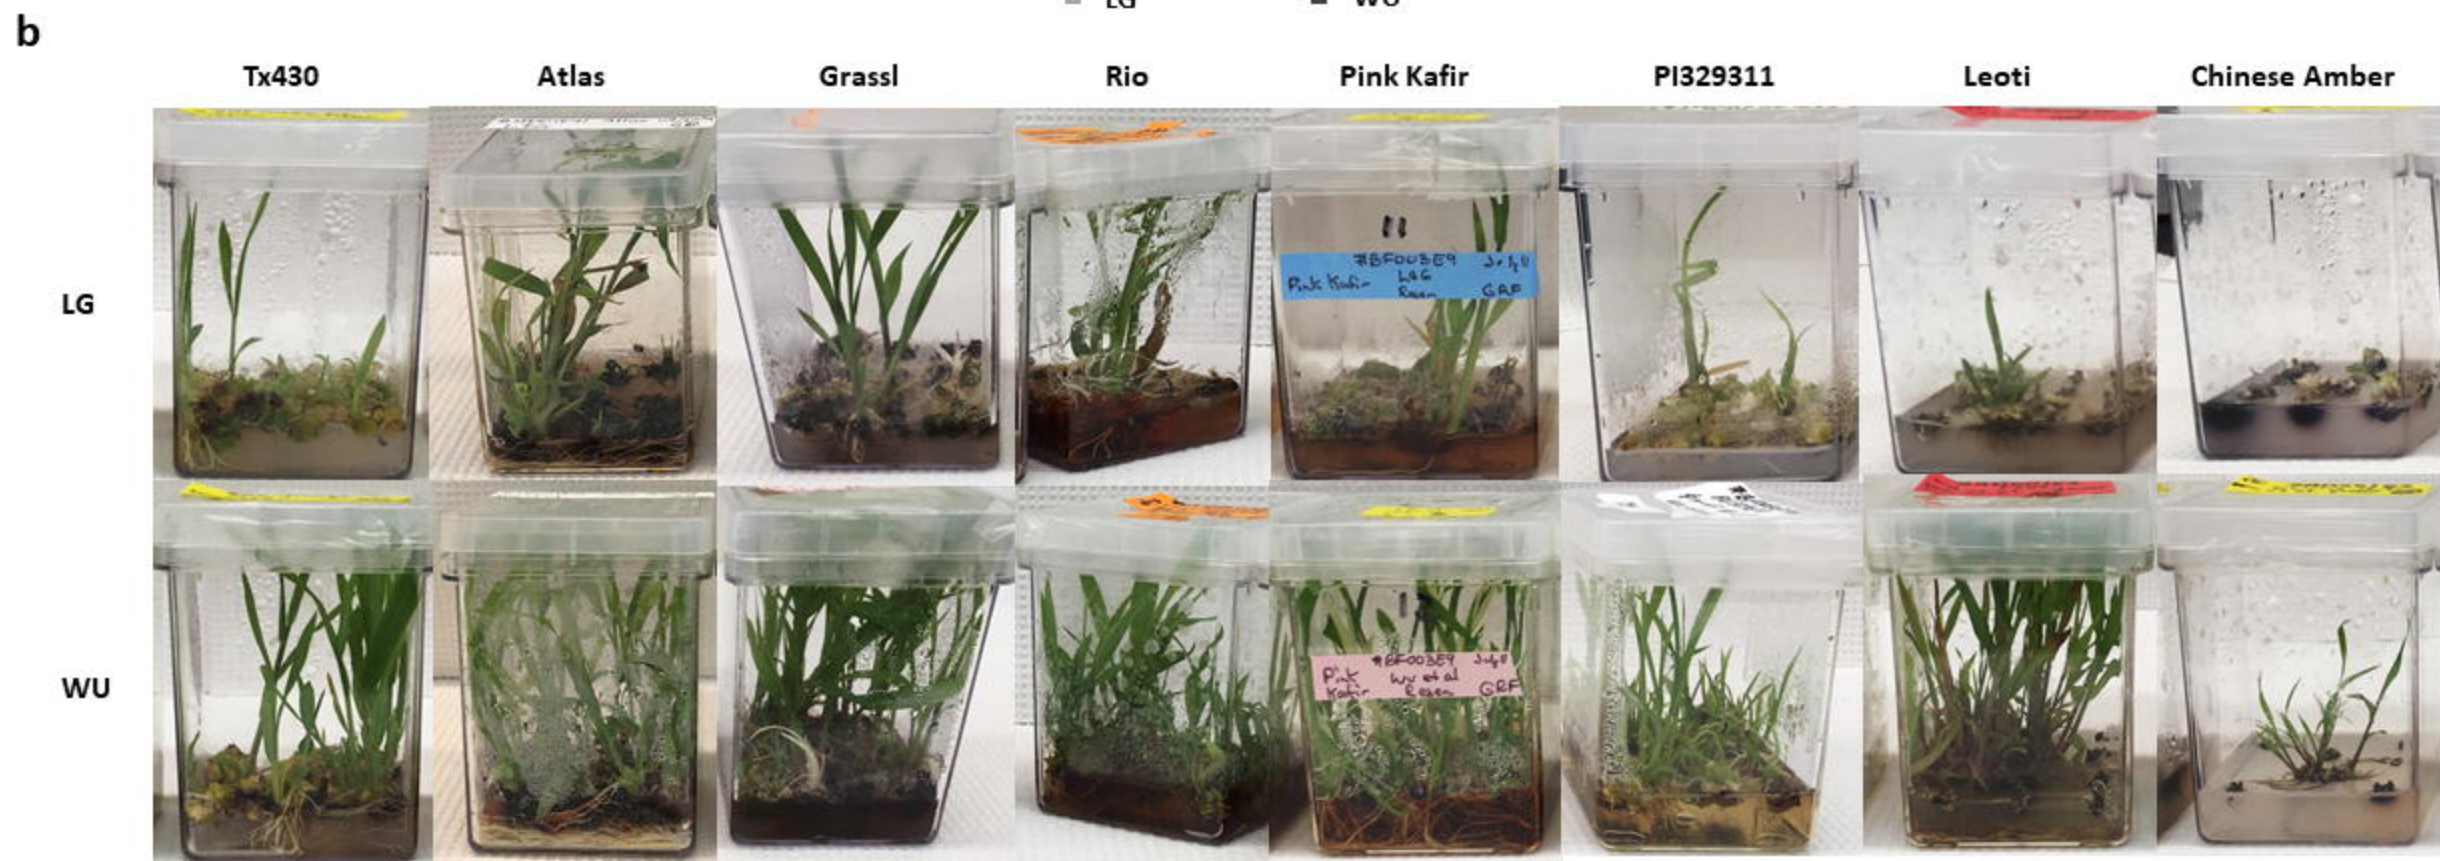

**a**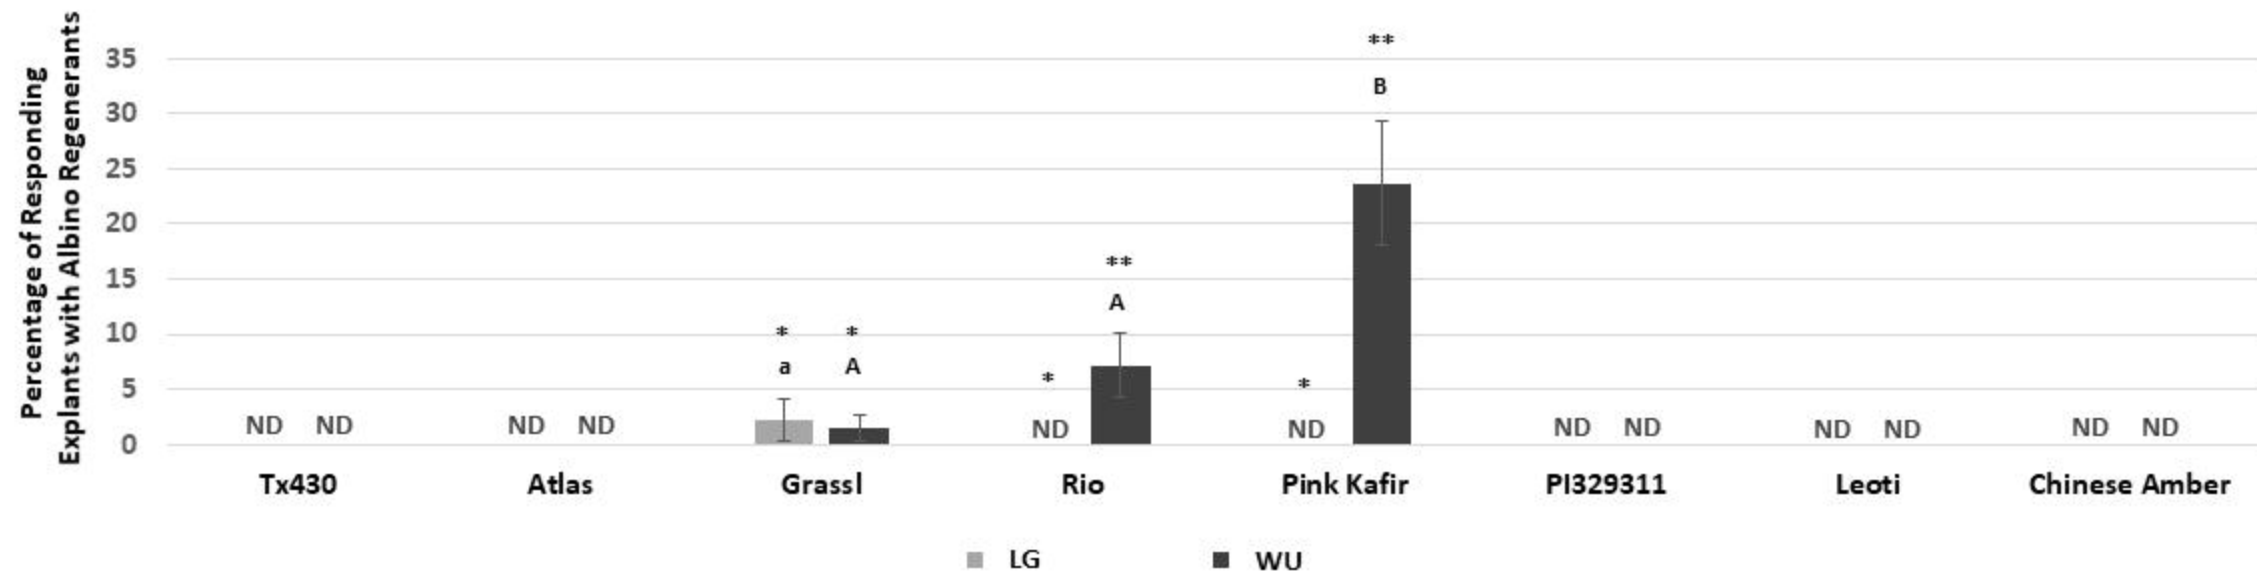**b**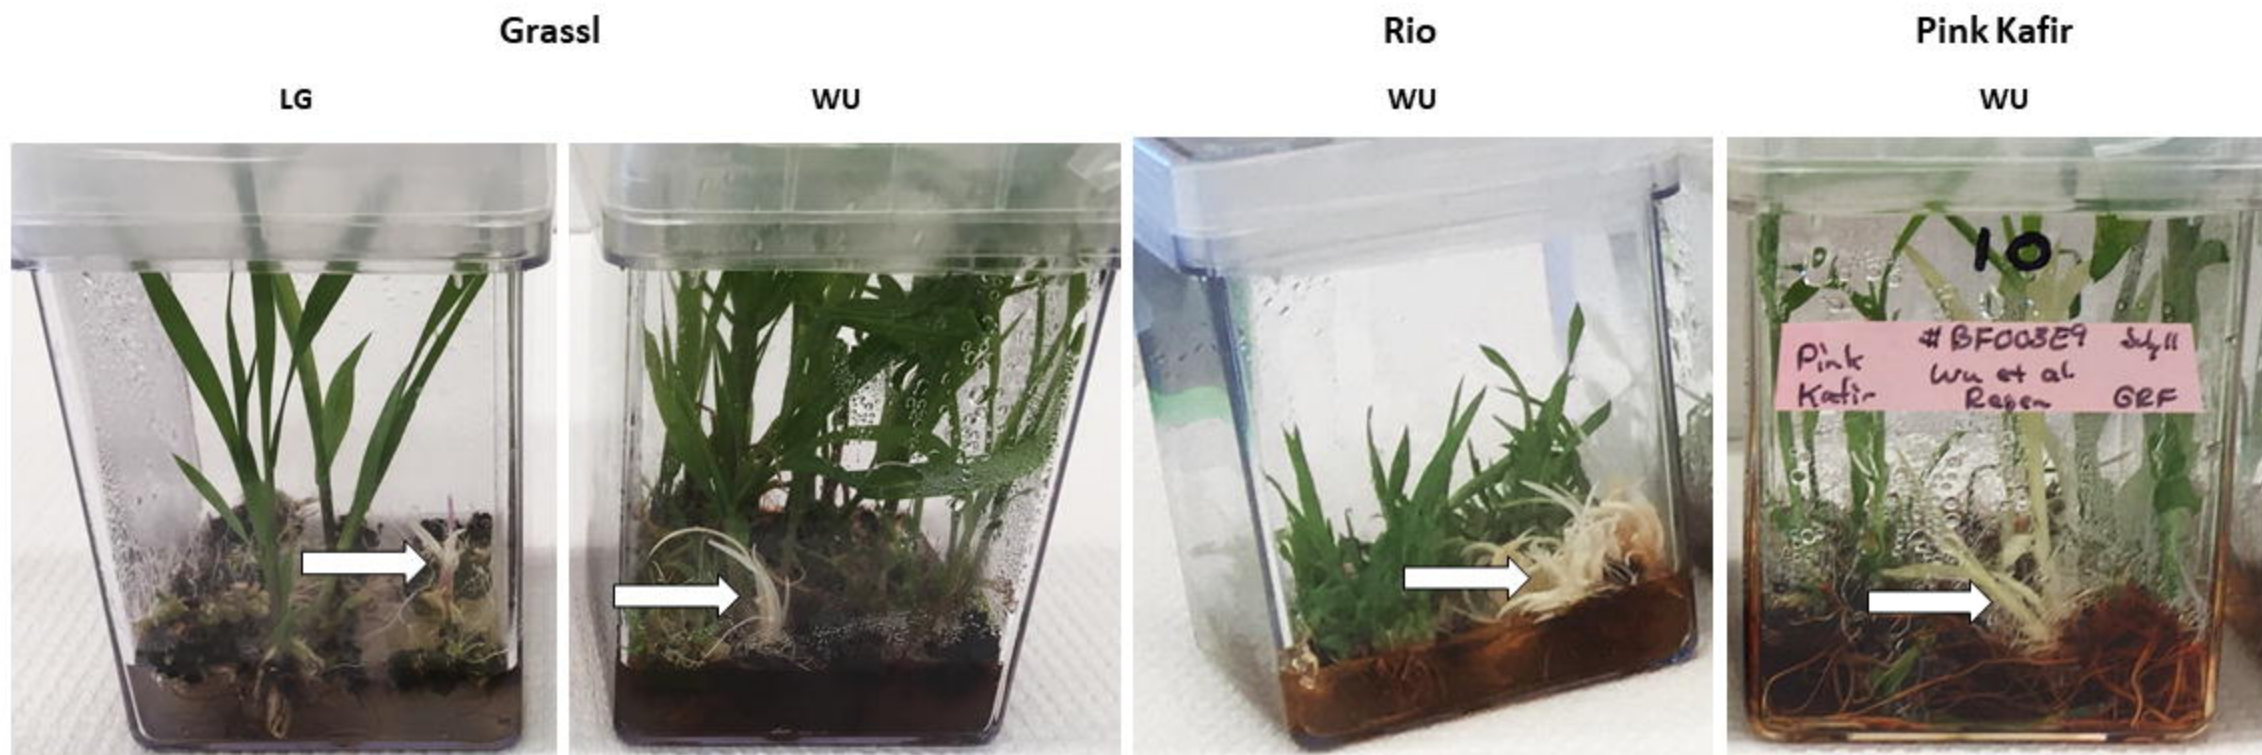

Source: https://www.biorxiv.org/content/10.1101/861328v1.full.pdf
